# Supplementary material for: Detection of β-d-glucuronidase activity in environmental samples using 4-fluorophenyl β-d-glucuronide and 19F NMR
Source: Royal Society of Chemistry journal article supplement (doi:10.1039/d4ay01723d), 2025-01-01

## Supplementary Information

### Characterisation

1.  $^{19}\text{F}$  NMR of tri-acetylated, 6-O-methyl ester of 4-fluorophenyl  $\beta$ -D-glucuronide in  $\text{D}_2\text{O}$
2.  $^1\text{H}$  NMR of tri-acetylated, 6-O-methyl ester of 4-fluorophenyl  $\beta$ -D-glucuronide in  $\text{D}_2\text{O}$
3.  $^{13}\text{C}$  NMR of tri-acetylated, 6-O-methyl ester of 4-fluorophenyl  $\beta$ -D-glucuronide in  $\text{D}_2\text{O}$
4.  $^{19}\text{F}$  NMR of 4-fluorophenyl  $\beta$ -D-glucuronide in  $\text{D}_2\text{O}$
5.  $^1\text{H}$  NMR of 4-fluorophenyl  $\beta$ -D-glucuronide in  $\text{D}_2\text{O}$
6.  $^{13}\text{C}$  NMR of 4-fluorophenyl  $\beta$ -D-glucuronide in  $\text{D}_2\text{O}$
7. General Experimental Procedures
8. Synthetic and Characterisation Details

### Reproducibility

#### *Full scale spectra*

9.  $^{19}\text{F}$  NMR of 4-F phenol control and NMR calibration curve
10.  $^{19}\text{F}$  NMR of hydrolysis control 1
11.  $^{19}\text{F}$  NMR of hydrolysis control 2
12.  $^{19}\text{F}$  NMR of hydrolysis control 3
13.  $^{19}\text{F}$  NMR of hydrolysis control 4

#### *Expanded spectra*

14.  $^{19}\text{F}$  NMR of 4-F phenol control
15.  $^{19}\text{F}$  NMR of hydrolysis control 1
16.  $^{19}\text{F}$  NMR of hydrolysis control 2
17.  $^{19}\text{F}$  NMR of hydrolysis control 3
18.  $^{19}\text{F}$  NMR of hydrolysis control 4

Compound (1). Methyl-1-(4-fluorophenyl)-2,3,4-tri-O-acetyl-  $\beta$ -D-glucopyranosyluronate

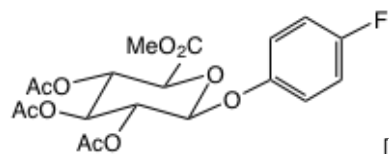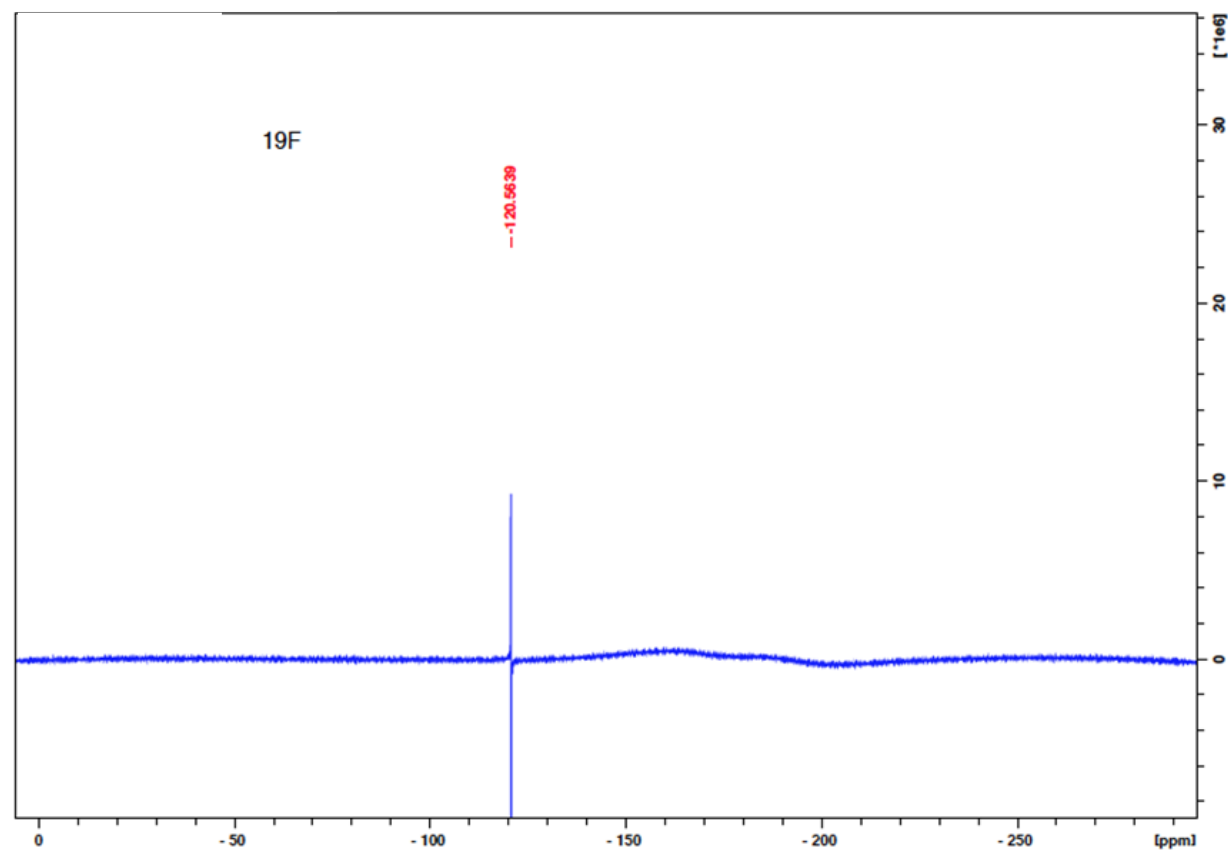

Compound (1). Methyl-1-(4-fluorophenyl)-2,3,4-tri-O-acetyl-  $\beta$ -D-glucopyranosyluronate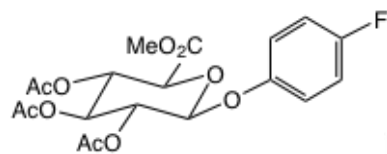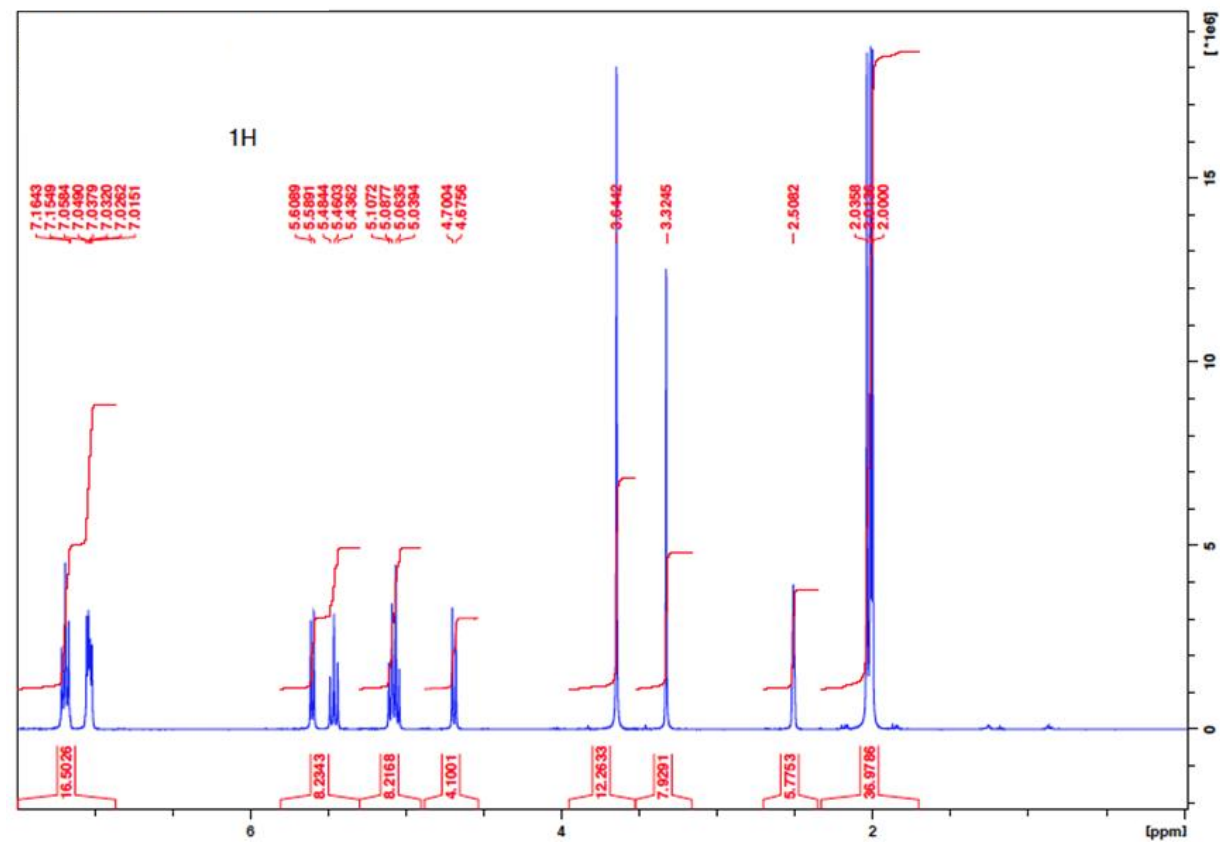

Compound (1). Methyl-1-(4-fluorophenyl)-2,3,4-tri-O-acetyl-  $\beta$ -D-glucopyranosyluronate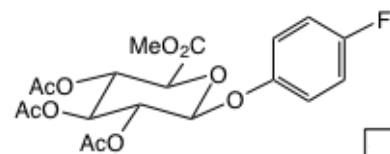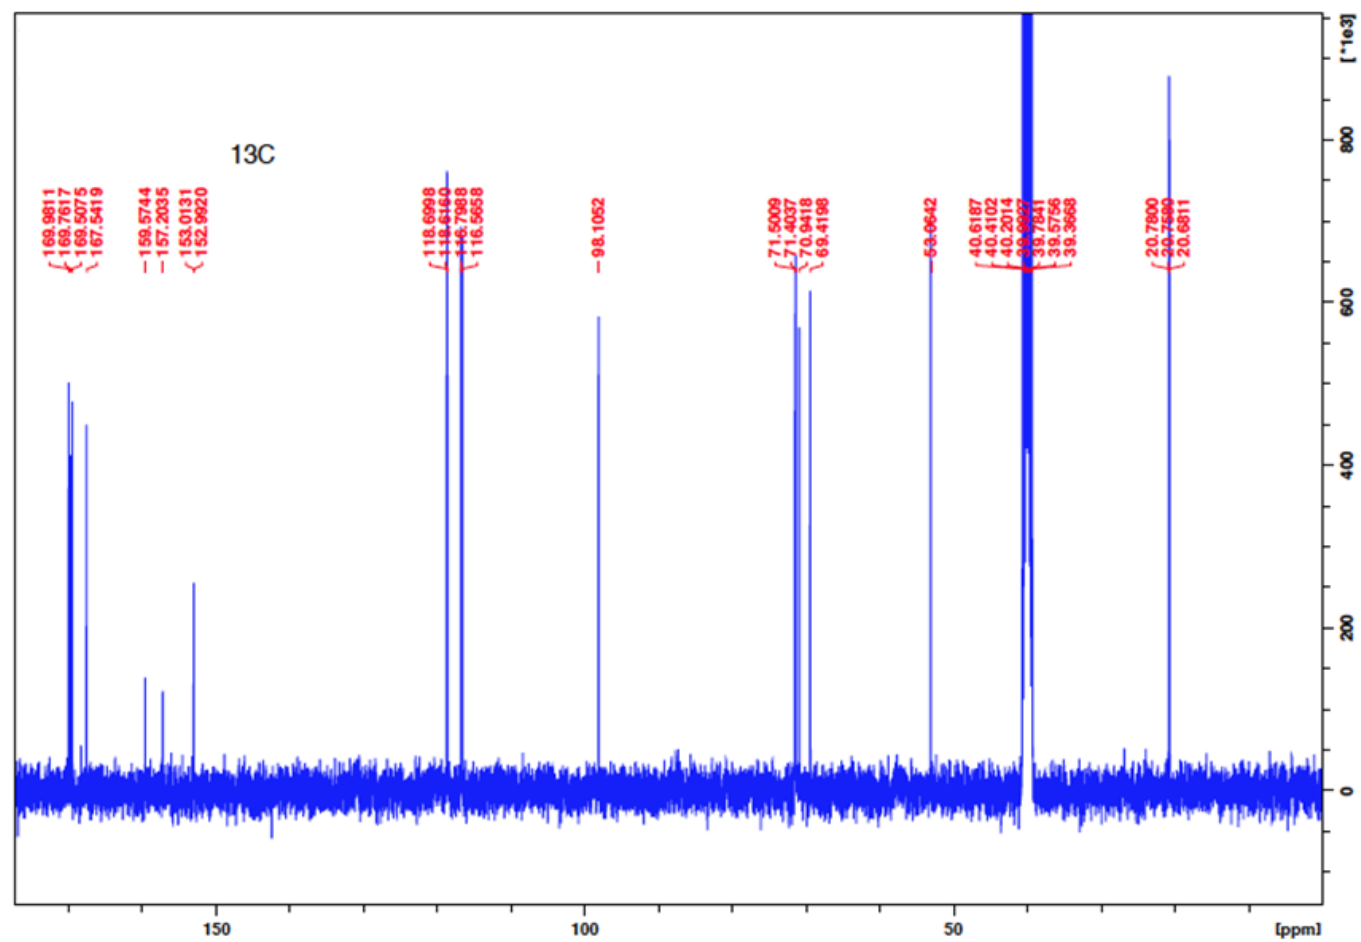

Compound (2). 4-fluorophenyl- $\beta$ -D-glucopyranosyluronate, sodium salt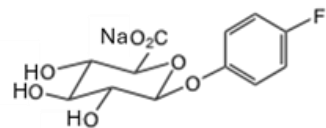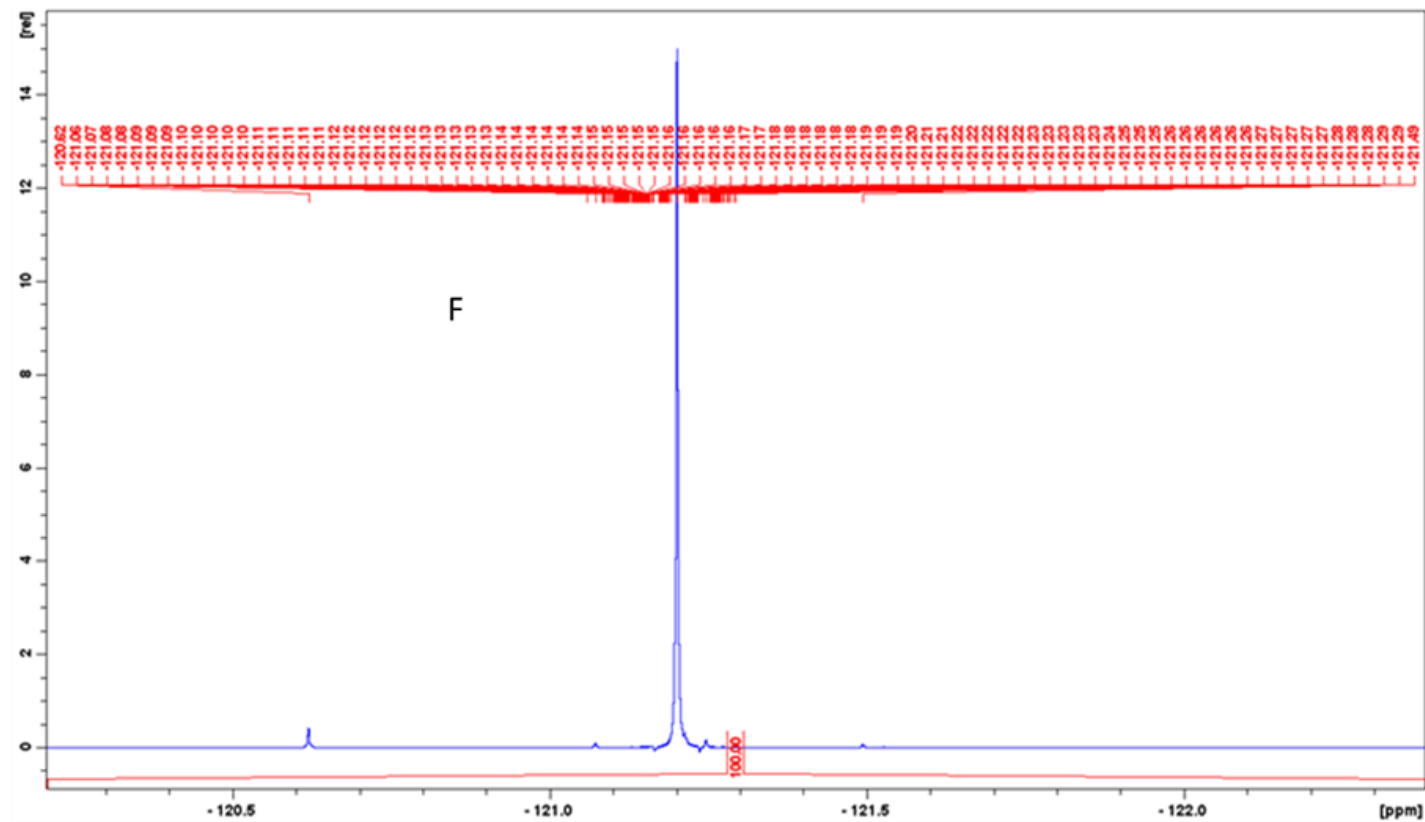

Compound (2). 4-fluorophenyl- $\beta$ -D-glucopyranosyluronate, sodium salt

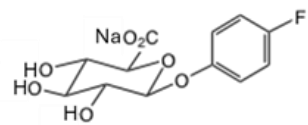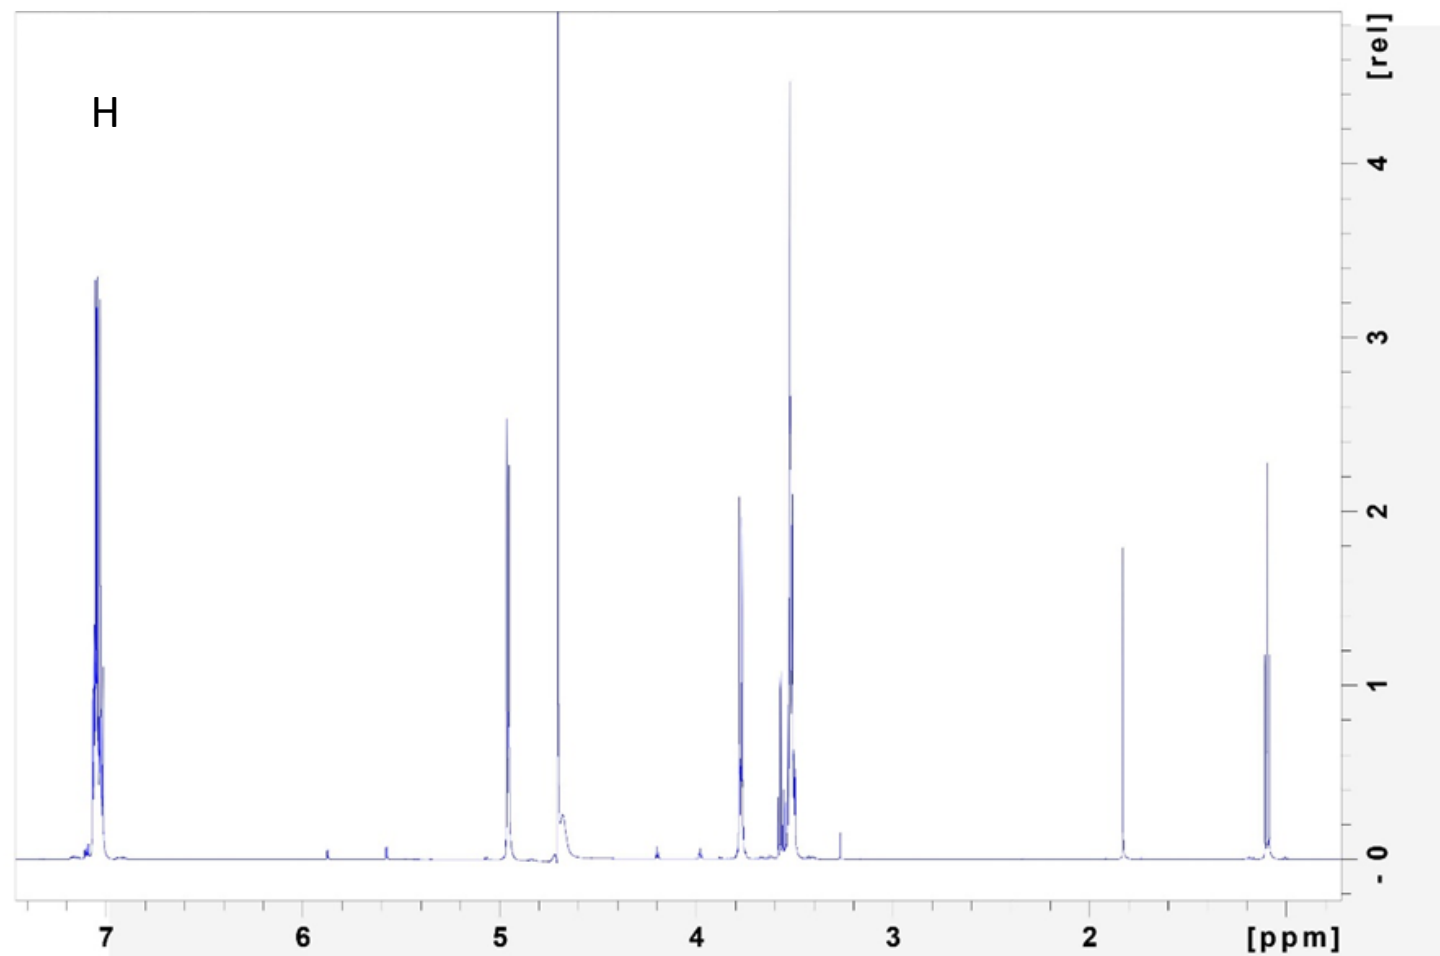

Compound (2). 4-fluorophenyl- $\beta$ -D-glucopyranosyluronate, sodium salt

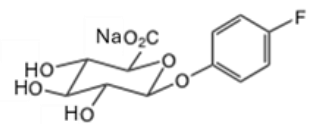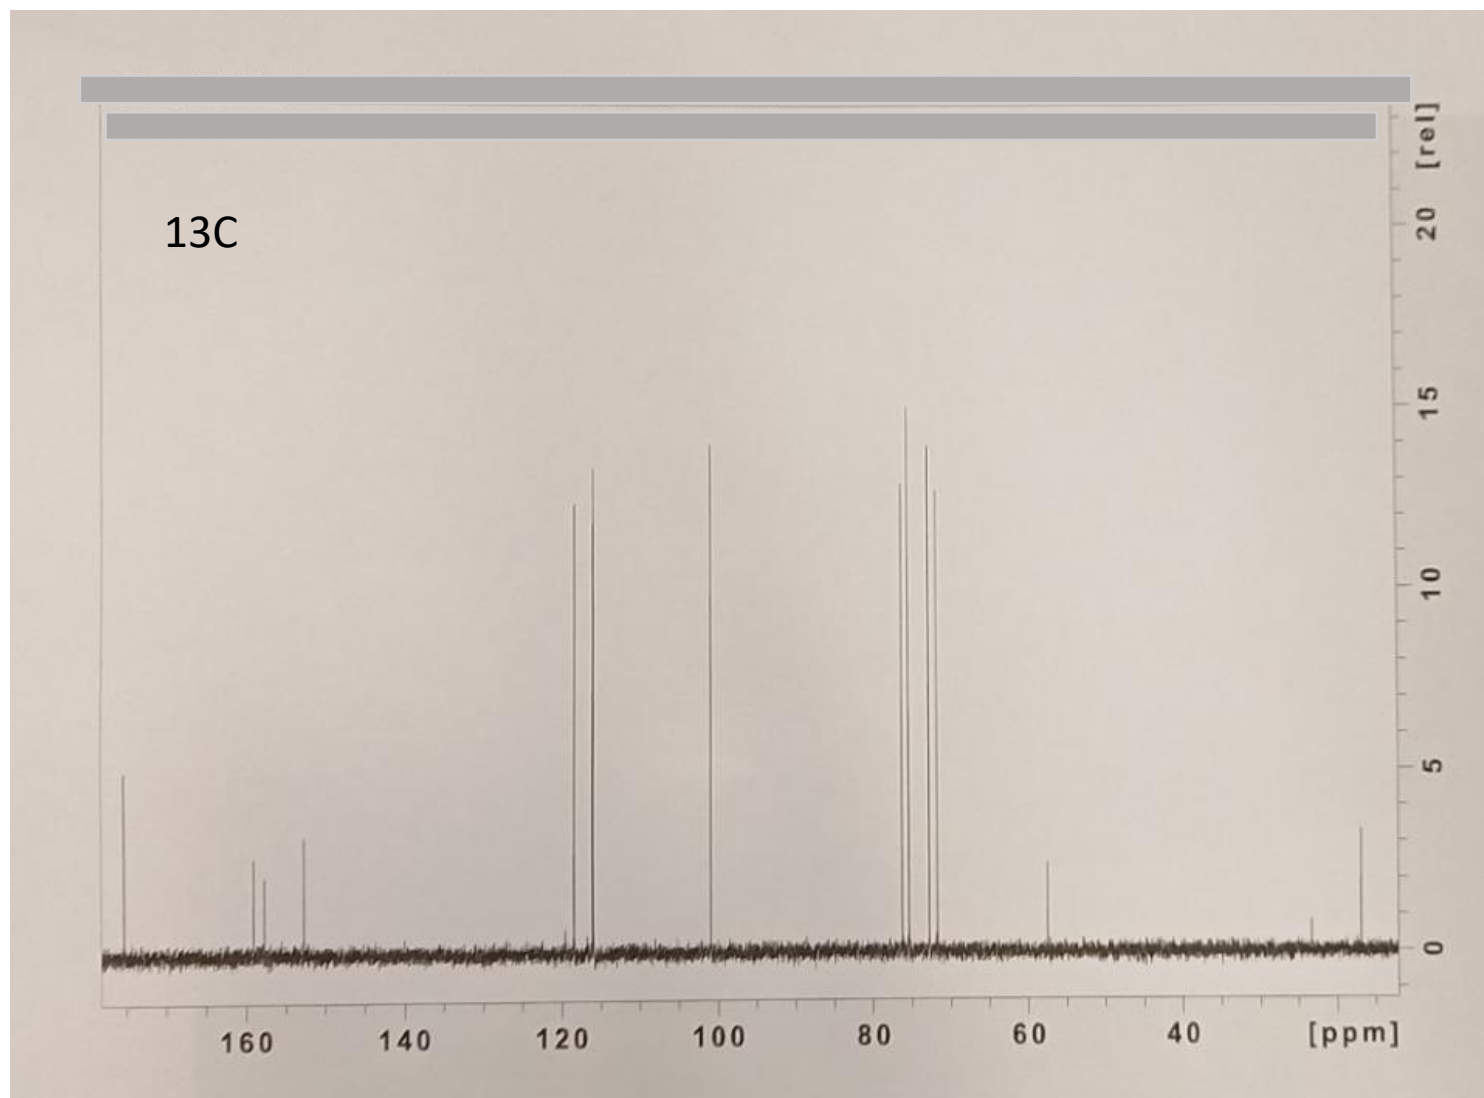

**General Experimental Procedures.**

Organic extracts were washed with saturated brine and dried over anhydrous  $\text{Na}_2\text{SO}_4$  prior to rotary evaporation at  $<30^\circ\text{C}$ . Moisture sensitive reactions were carried out in anhydrous organic solvents (purchased from Sigma-Aldrich) under a  $\text{N}_2$  or Ar atmosphere. Reactions were monitored by analytical thin-layer chromatography using Merck Kieselgel 60 F<sub>254</sub> silica plates, and were viewed under UV or by staining with  $\text{KMnO}_4$  or iodine. Preparative flash column chromatography was performed on either VWR Prolabo silica gel or Sigma-Aldrich silica gel (particle size 40-63 Å). Melting points were recorded using a Bibby-Sterilin Stuart SMP3 melting point apparatus and are uncorrected. Mass spectra were obtained in either electrospray mode (ES) with a Micromass LCT or chemical ionization (CI) mode with a Micromass Trio 1000 using ammonia. Elemental analyses were performed by Mrs. Jean Ellis, University of Liverpool.  $^1\text{H}$  and  $^{13}\text{C}$  NMR spectra were obtained using Bruker Avance or Bruker DPX 400 (Dept. Chemistry, UoL), and Bruker Avance 600 MHz or Bruker Avance II+ 800 MHz instruments (LJMU and UoL) for the 400, 600 or 800 MHz respectively for  $^1\text{H}$  spectra and 100, 150 and 200 MHz for  $^{13}\text{C}$  spectra. Chemical shifts are reported in ppm ( $\delta$ ) relative to  $\text{Me}_4\text{Si}$ . Coupling constants ( $J$ ) are reported in Hz.



## Synthetic and Characterisation Details

### Compound (1). Methyl-1-(4-fluorophenyl)-2,3,4-tri-O-acetyl- $\beta$ -D-glucopyranosyluronate:-

Compound (1) was prepared from 4-fluorophenol using the trichloroacetimidate methods in and 69% yields: Methyl-1,2,3,4-tetra-O-acetyl- $\beta$ -D-glucopyranosyluronate (1) and 4-fluorophenol (1 eq. of each) were dissolved in anhydrous dichloromethane (4 mL per mmol), then stirred for 2 h under N<sub>2</sub> [at 20°C] with 4 Å molecular sieves. Trimethylsilyl trifluoromethanesulfonate (1 eq.) was added to the reaction mixture, which was stirred for a further 3.5 h. The reaction mixture was quenched with saturated aqueous sodium bicarbonate (20 mL per mmol) and diluted with ethyl acetate (20 mL per mmol). After separation, the organic layer was washed with water followed by brine, then dried with anhydrous MgSO<sub>4</sub>. Following filtration and evaporation under reduced pressure, the crude product was purified by column chromatography using a gradient of 30-50% ethyl acetate in hexane to afford the glucuronide ester: <sup>1</sup>H NMR (400 MHz, DMSO-d<sub>6</sub>) 2.00, 2.01 and 2.04 (9 H, 3s, 3xCH<sub>3</sub>CO), 3.64 (3H, s, CH<sub>3</sub>O), 4.69 (1 H, d, J = 10.0 Hz, 5-H), 5.04-5.11 (2 H, m, 2-H + 4-H), 5.46 (1 H, t, J = 9.6 Hz), 5.60 (1 H, d, J = 8.0 Hz, 1-H), 7.03 (2 H, approx. dd, ArH) and 7.15 (2 H, approx. dd, ArH); <sup>13</sup>C NMR (100 MHz, DMSO-d<sub>6</sub>) 20.7, 20.8 (x2), 53.1, 69.4, 70.9, 71.4, 71.5, 98.1, 116.7 (d, J = 23 Hz), 118.7 (d, J = 8 Hz), 153.0 (d, J = 2 Hz), 158.4 (d, J = 237 Hz), 167.5, 169.5, 169.8 and 170.0; Found: C, 53.36; H, 4.9; m/z, 451.1016 (MNa<sup>+</sup>, ESI +ve mode); C<sub>19</sub>H<sub>21</sub>FO<sub>10</sub> requires C, 53.3; H, 4.9%; C<sub>19</sub>H<sub>21</sub>FO<sub>10</sub>.Na requires C, 54.5; H, 5.5%; C<sub>19</sub>H<sub>21</sub>FO<sub>10</sub>.Na requires m/z, 451.1016.

### Compound (2). 4-Fluorophenyl- $\beta$ -D-glucopyranosyluronate, sodium salt:-

Compound (1) (0.210 g, 0.49 mmol) was stirred in methanol (5 mL) at 0°C then 0.5 M NaOH (1.0 mL) was added over 12 min. The solution was allowed to regain 20°C over 1 h, then further 0.5 M NaOH (0.04 mL) was added. After stirring for another 0.25 h, the solution was evaporated to dryness then azeotroped with ethanol (3x 5 ML) to afford the product as a white solid (0.160 g), which was sufficiently pure for assays: <sup>1</sup>H NMR (700 MHz, D<sub>2</sub>O)  $\delta_H$  3.53-3.49 (3 H, m, 2-H, 3-H, 4-H), 3.77 (1 H, d, J=8.9 Hz, 5-H), 4.95 (1 H, d, J=8.8 Hz, 1-H), 7.017-7.068 (4 H, m, ArH); (175 MHz, D<sub>2</sub>O)  $\delta_C$  71.6, 72.8, 75.5, 76.3, 101.0, 116.1 (d, <sup>2</sup>J<sub>C-F</sub> 18 Hz), 118.5, 152.8, 158.6 (d, <sup>1</sup>J<sub>C-F</sub> 231 Hz) and 176.0;  $\delta_F$  (564 MHz, D<sub>2</sub>O) -125.1 (s, 1F) relative to 4-fluorophenol in D<sub>2</sub>O (as external standard = -125.1 (s)). Found: m/z, 287.0564 (ESI -ve mode); C<sub>12</sub>H<sub>12</sub>FO<sub>7</sub> requires m/z, 287.0567.

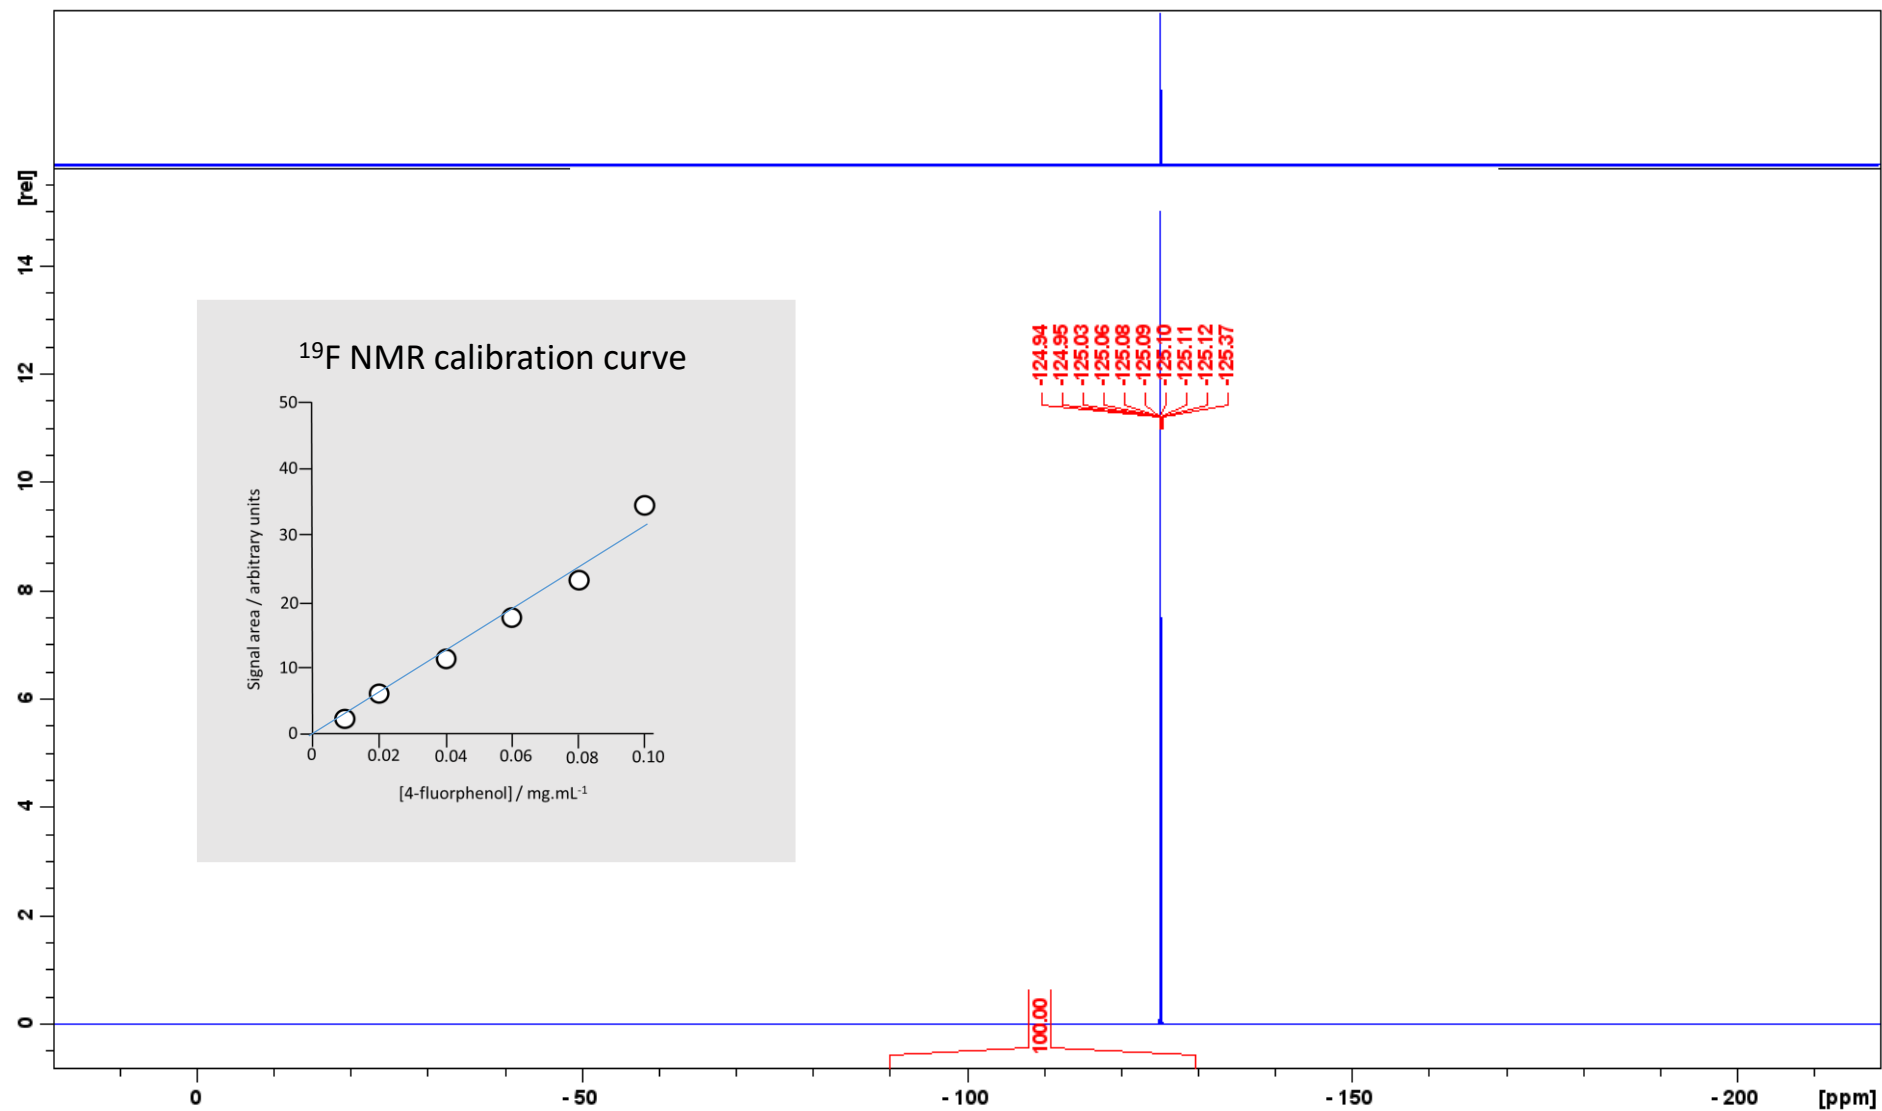

10  $^{19}\text{F}$  NMR of hydrolysis control 1 – full scale

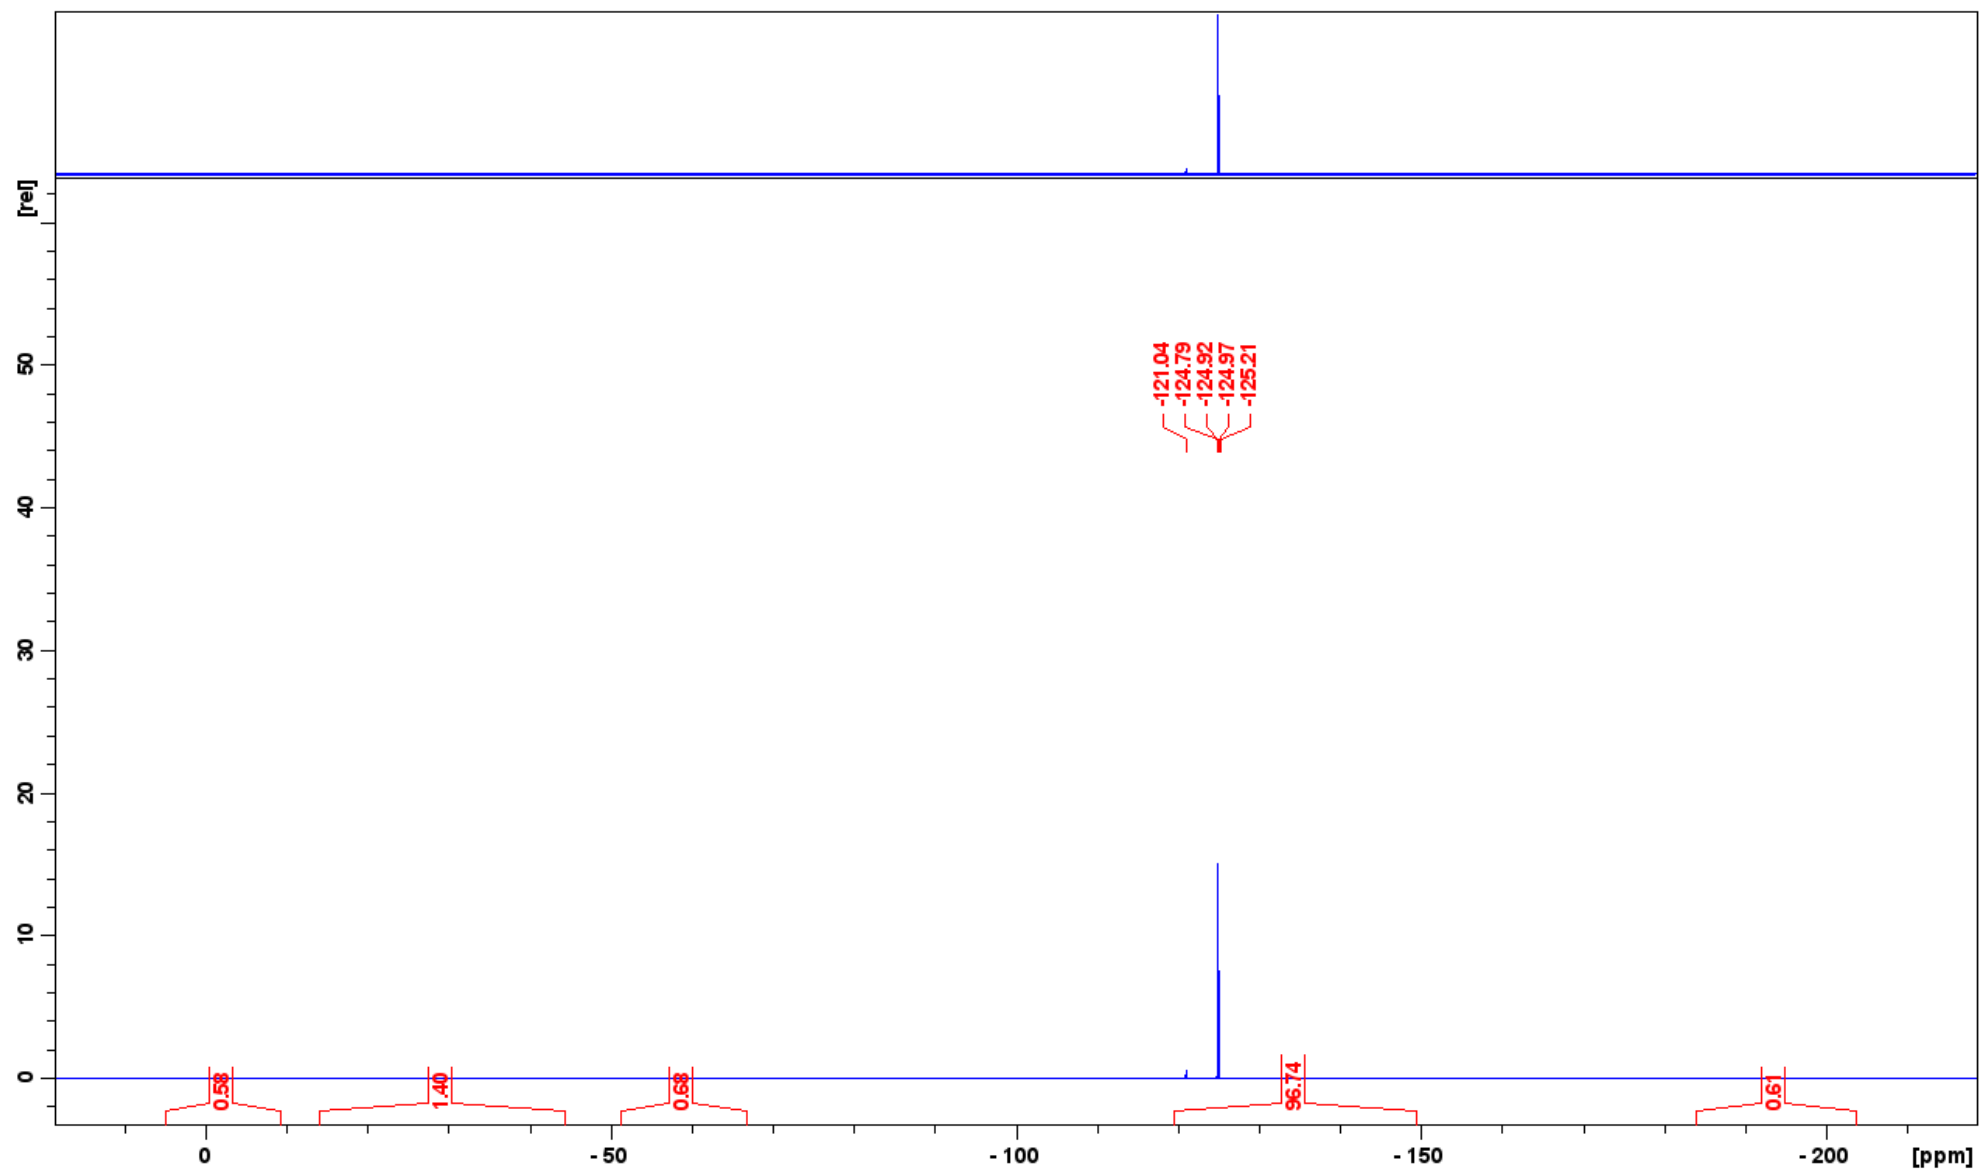

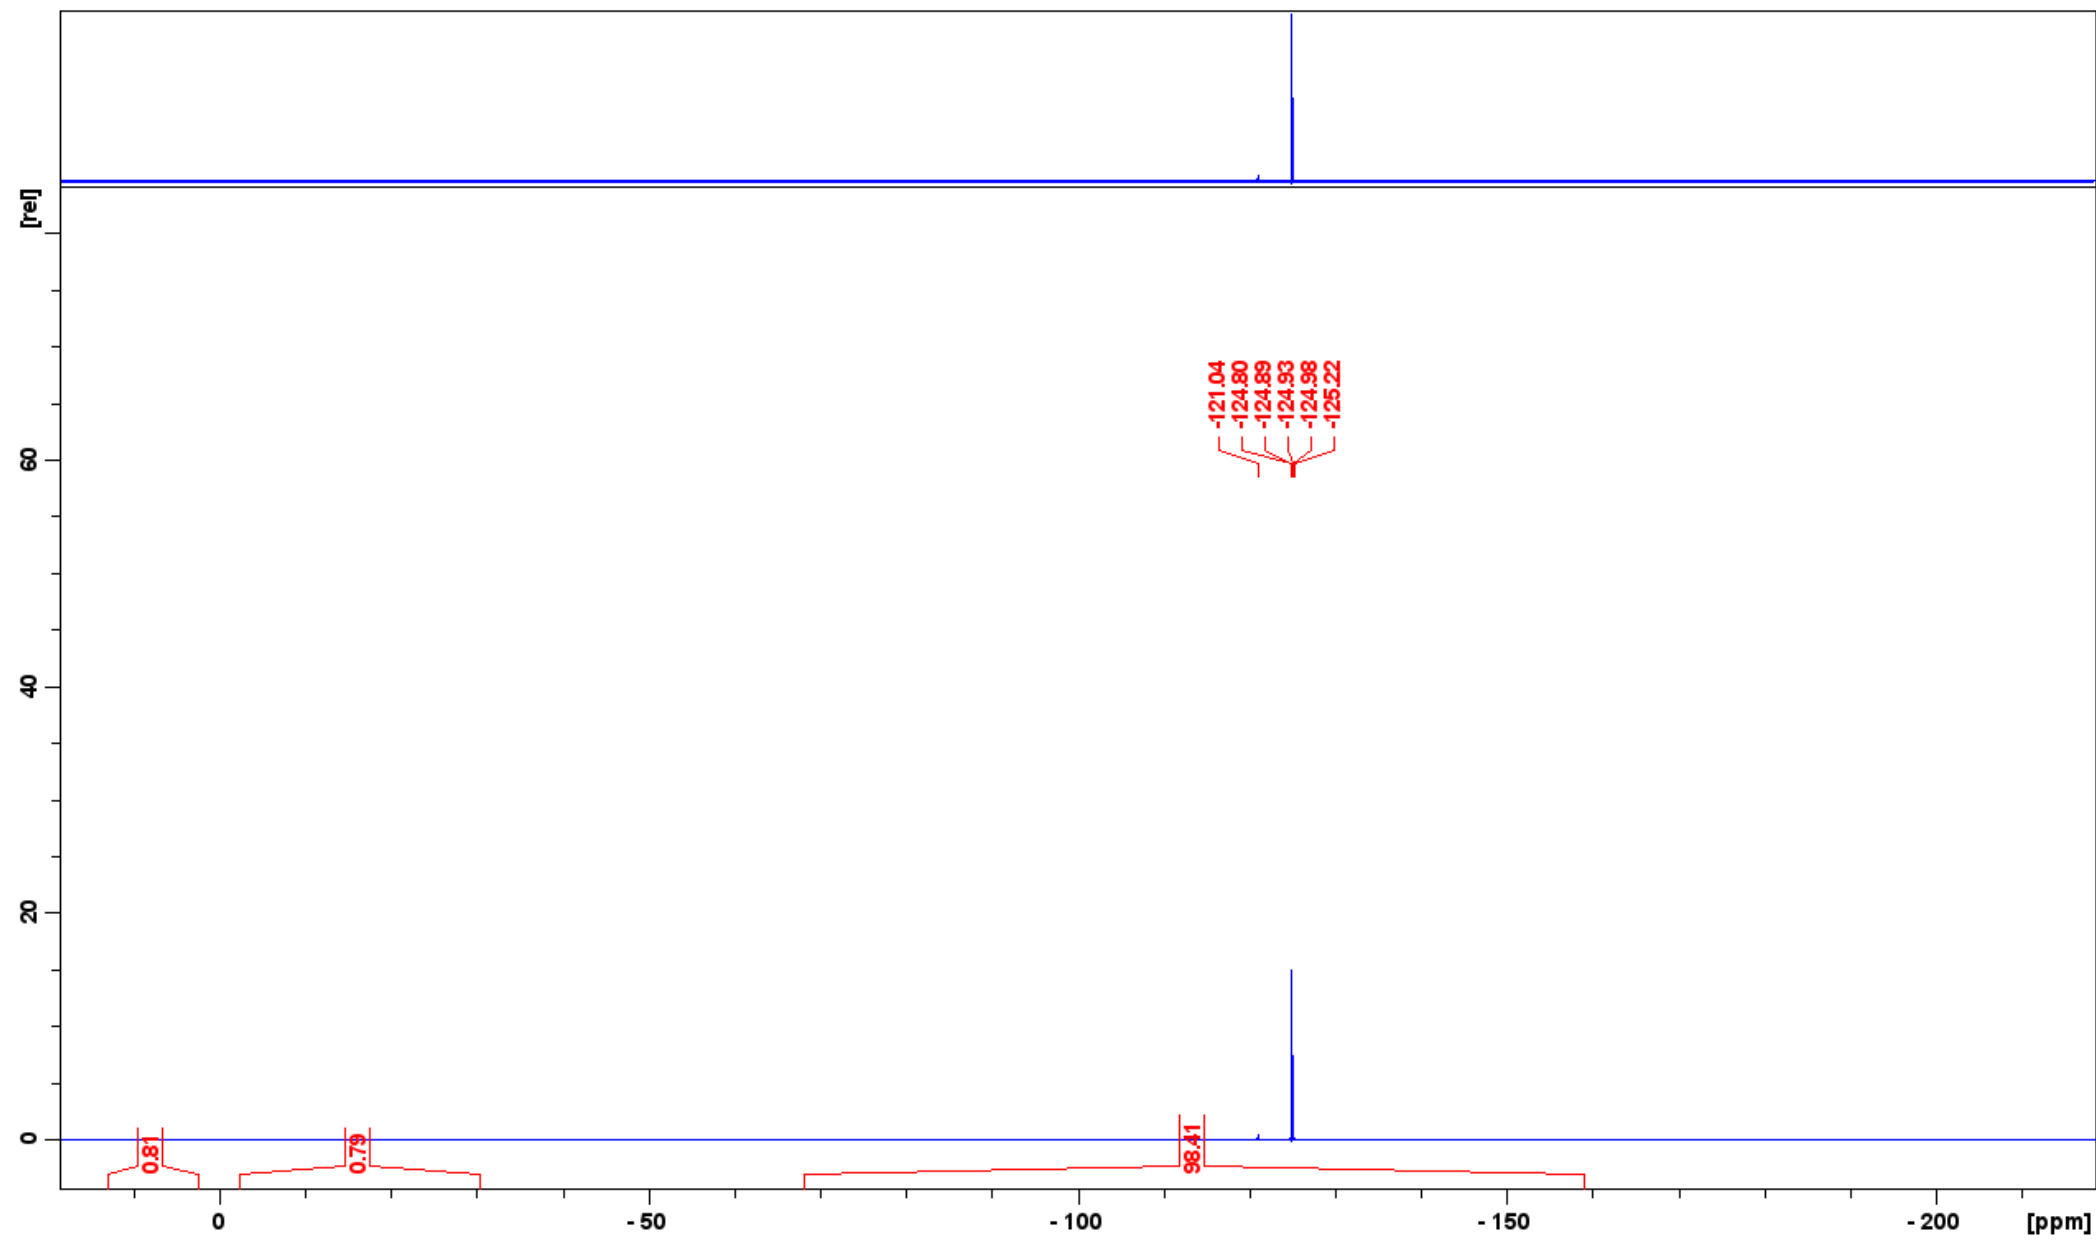

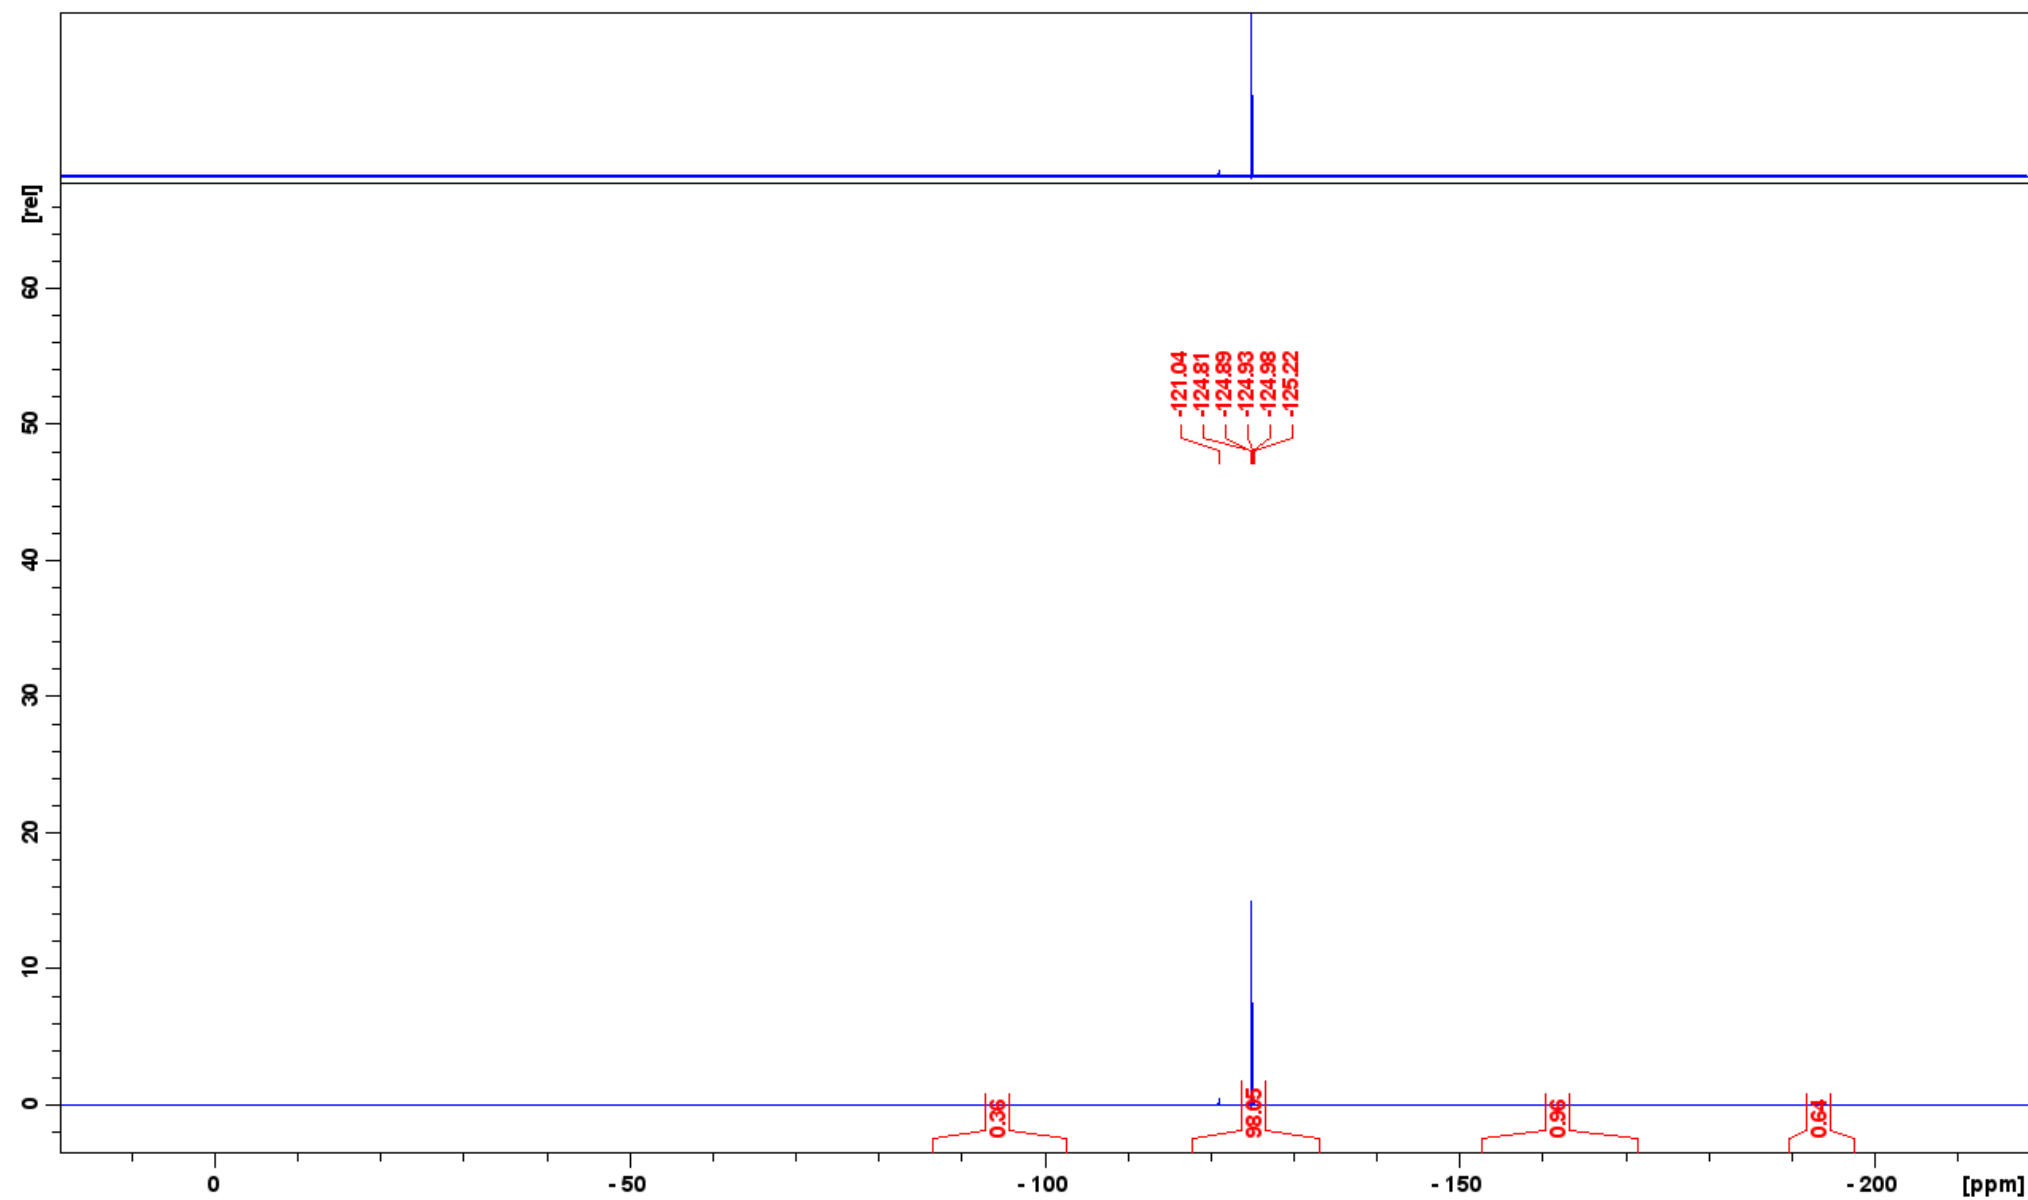

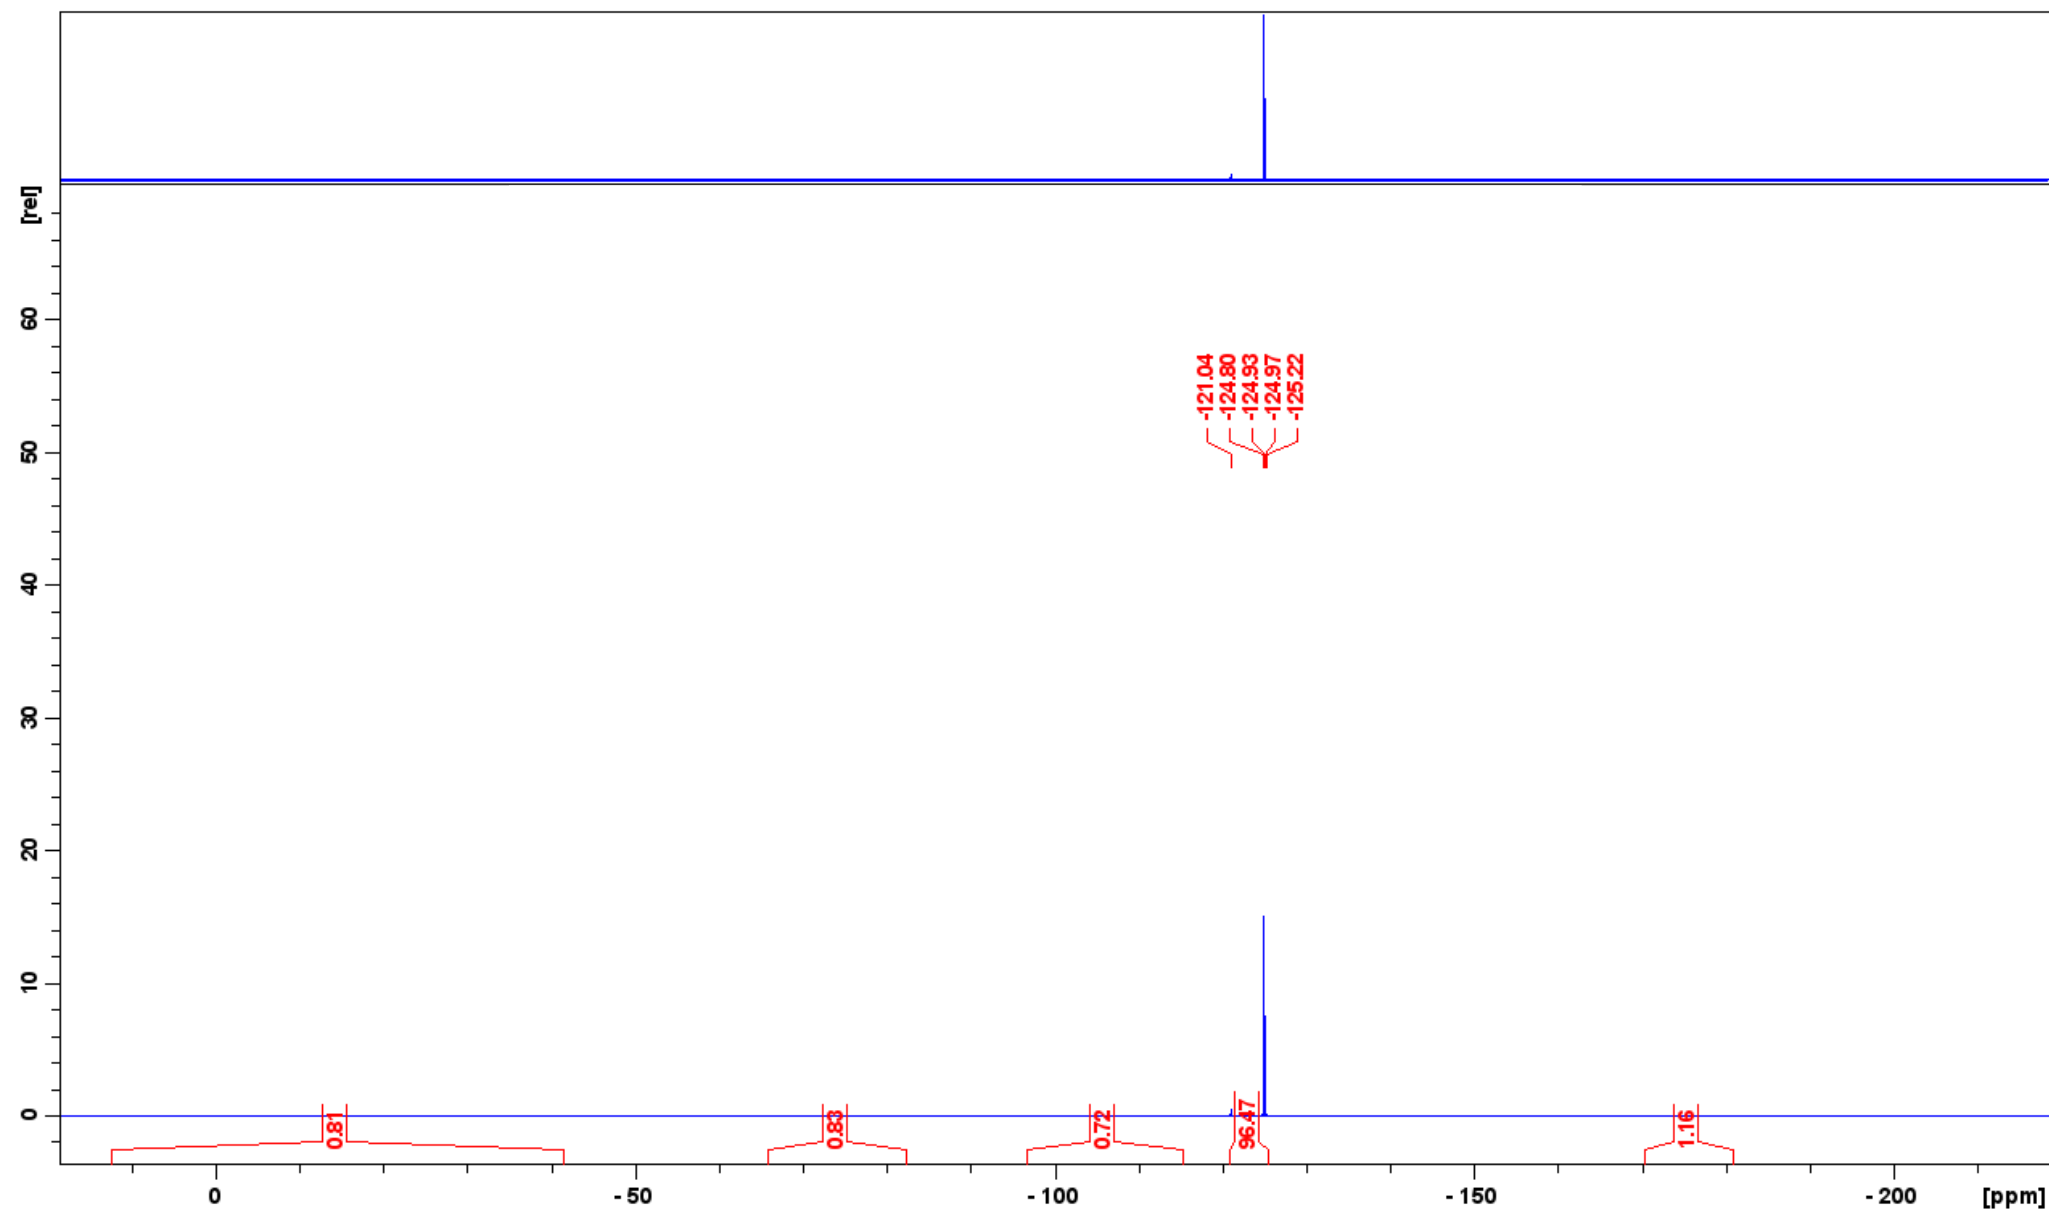

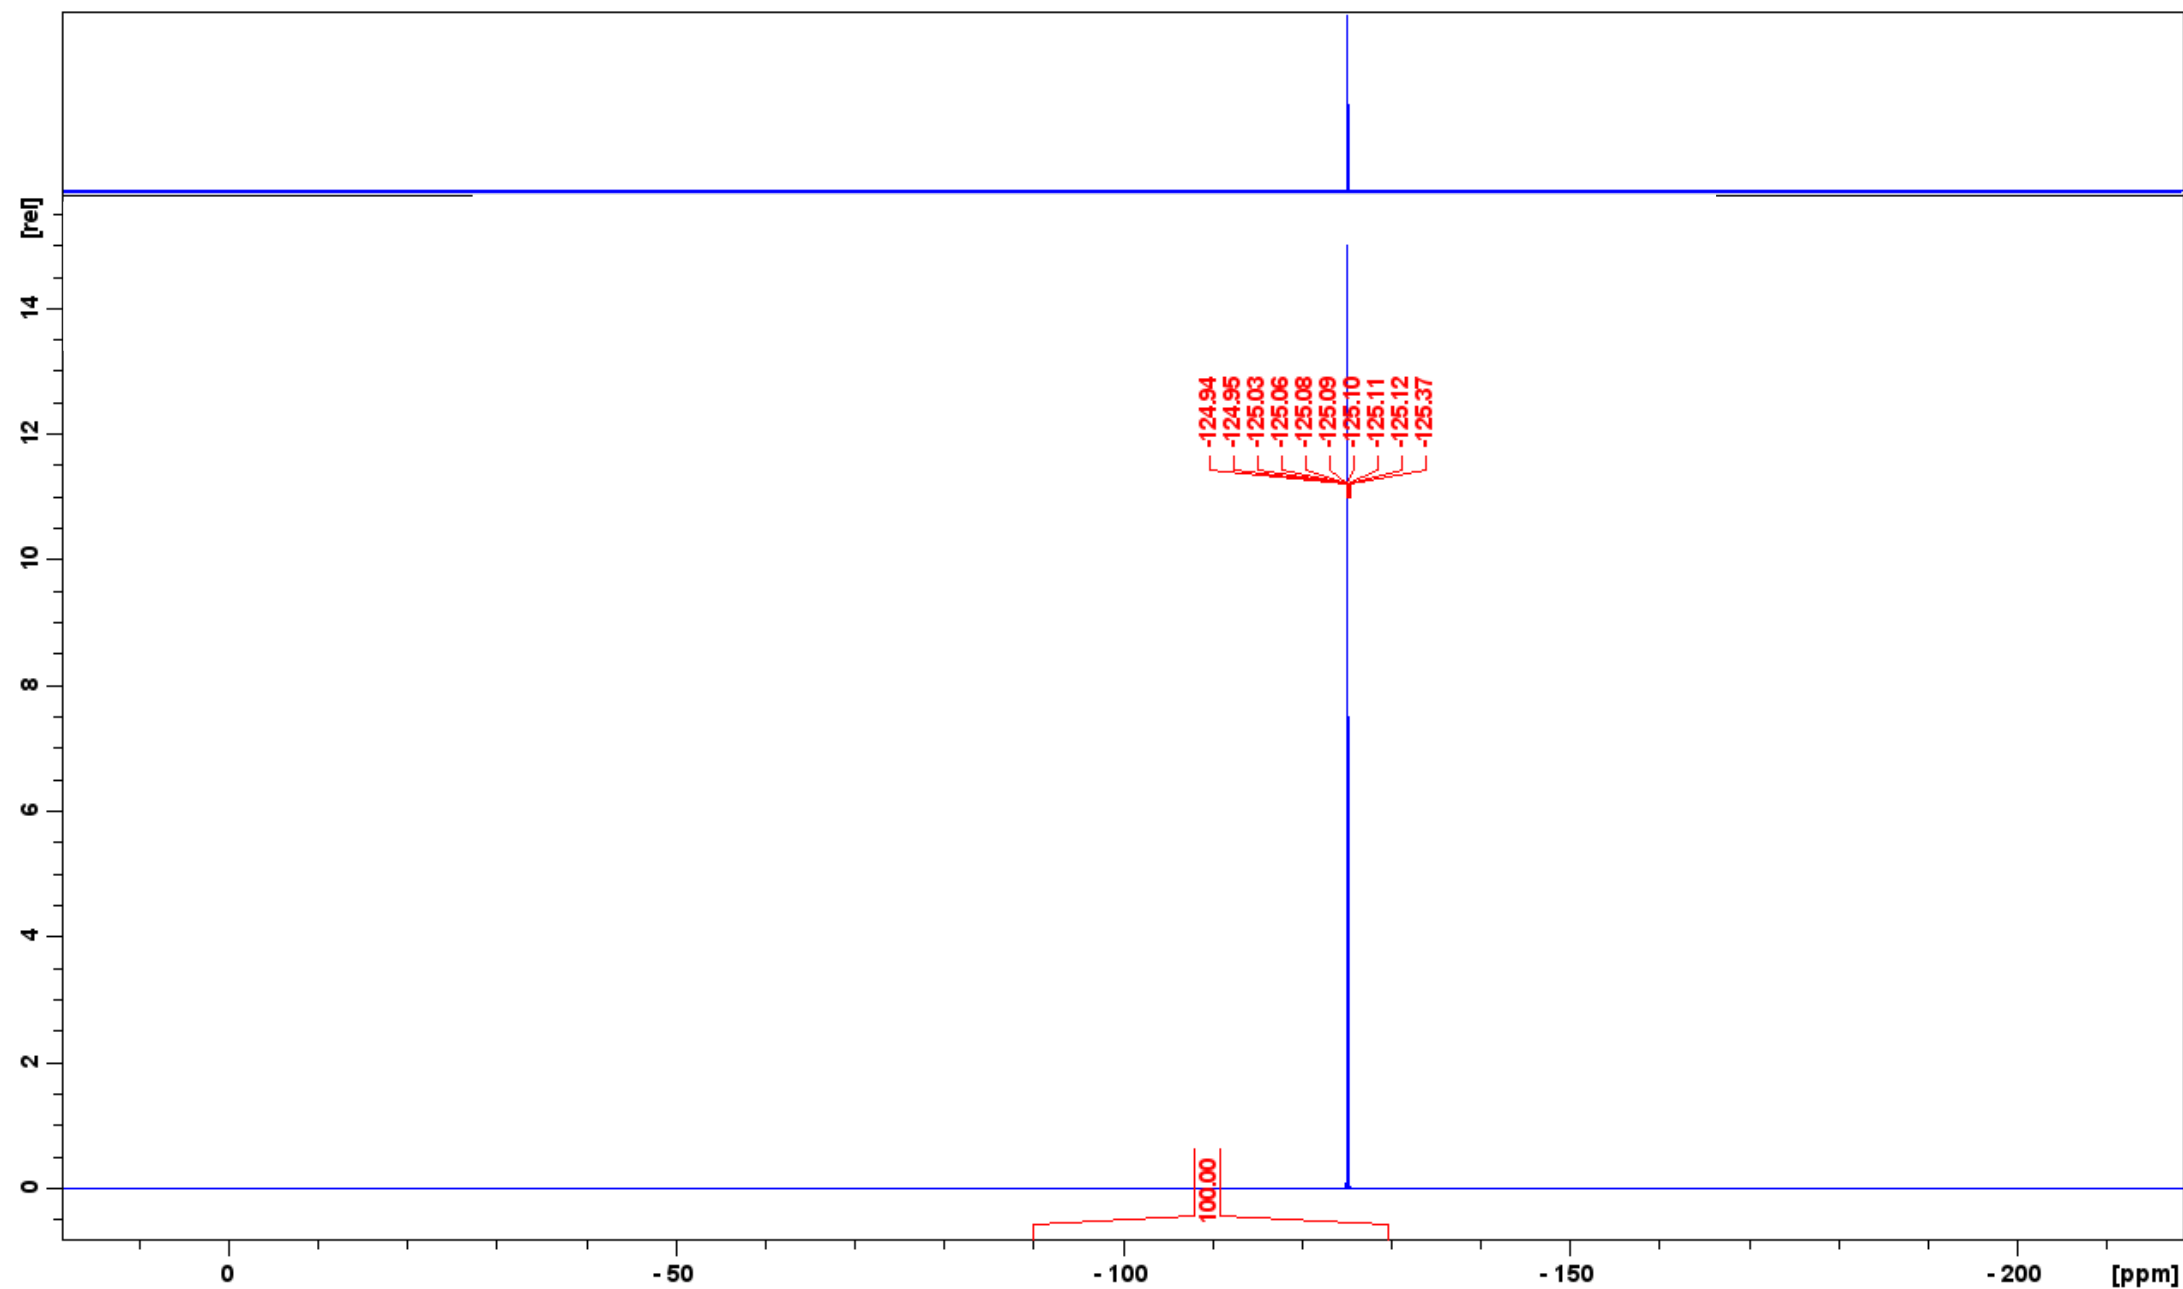

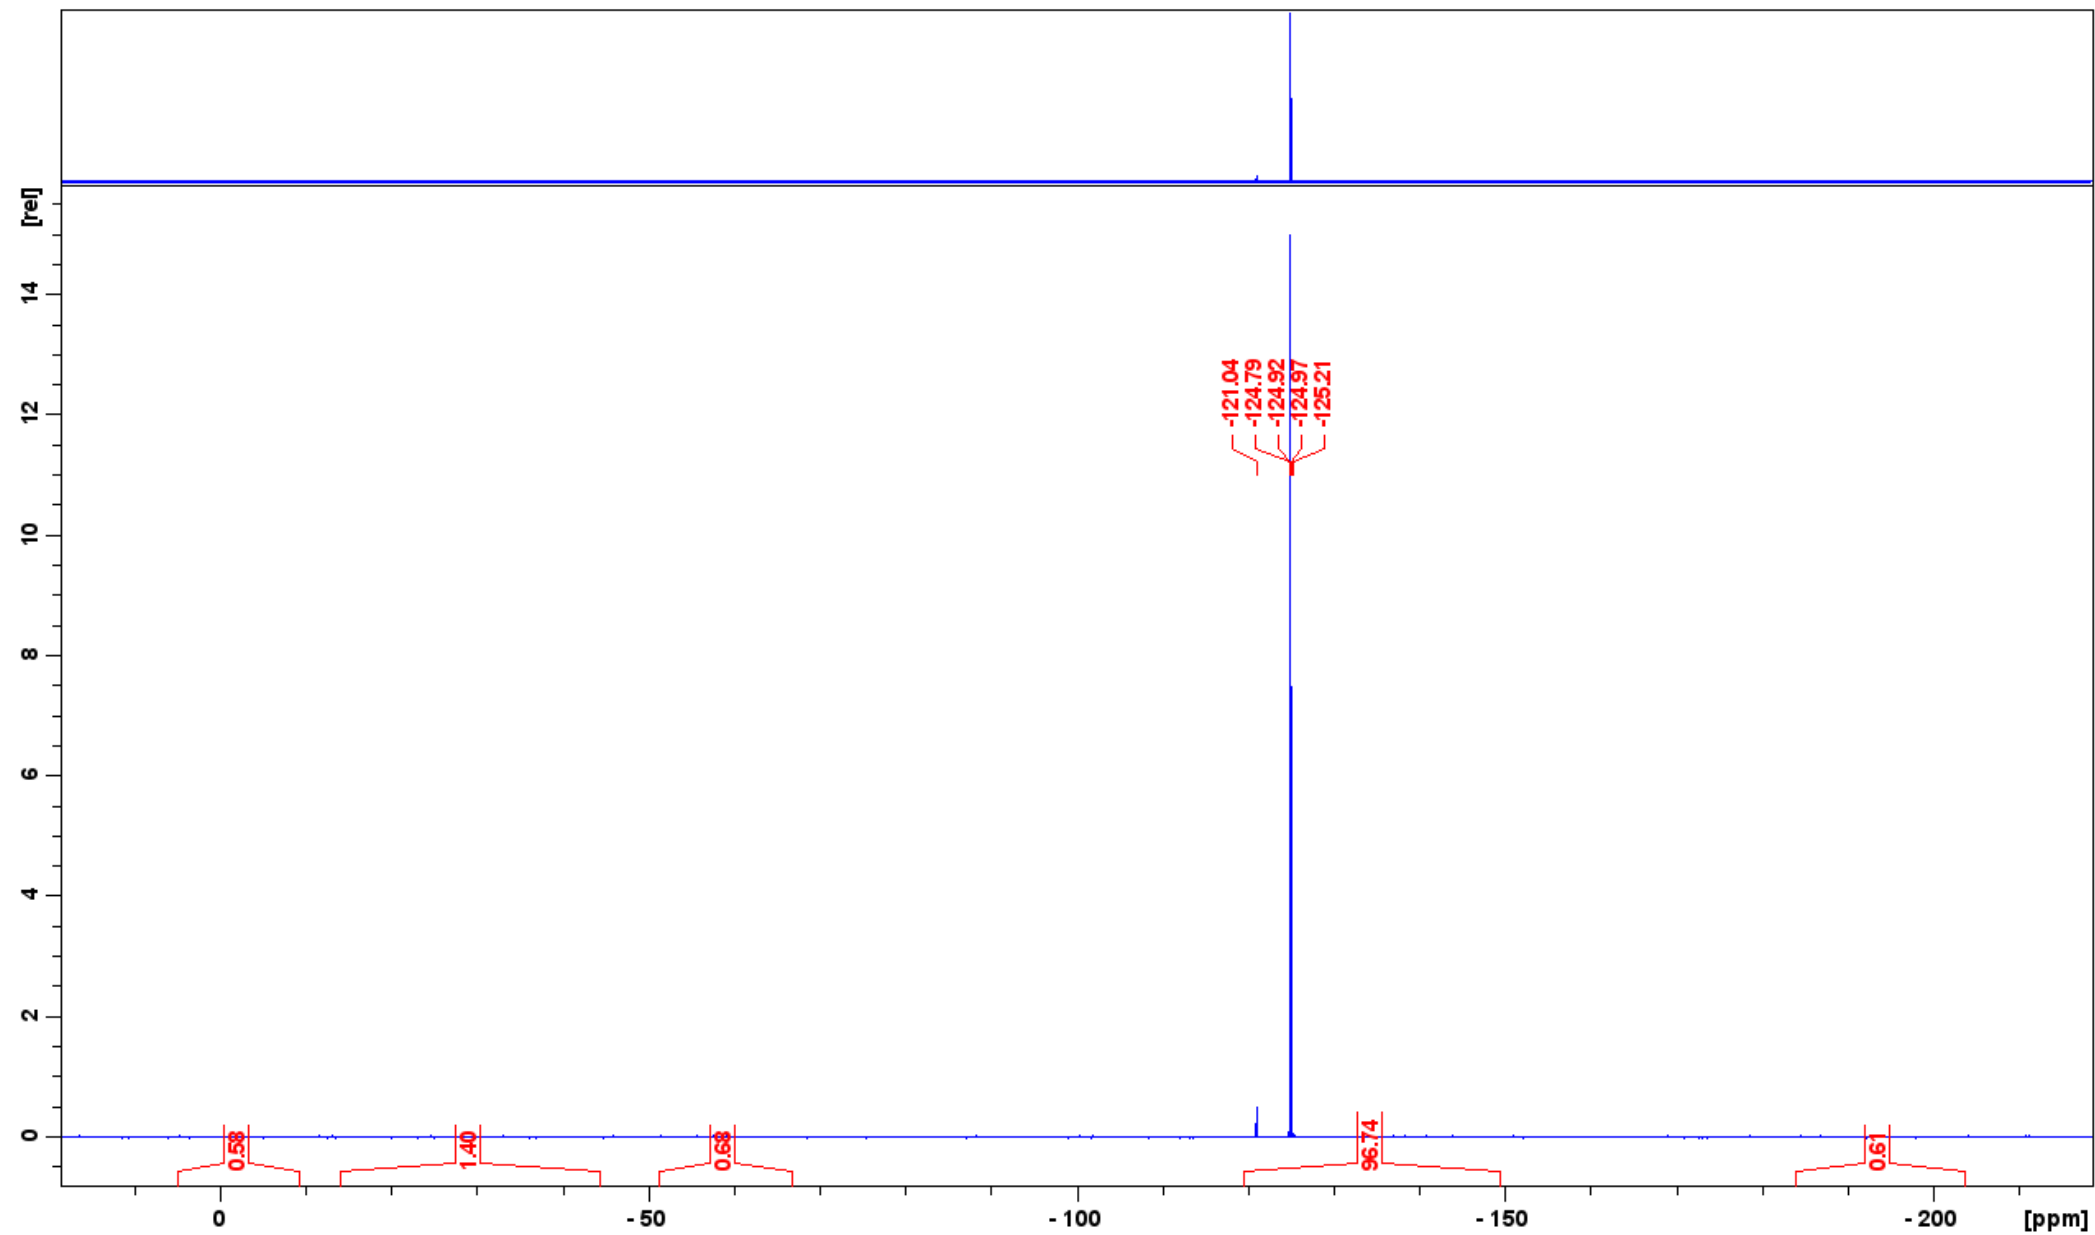



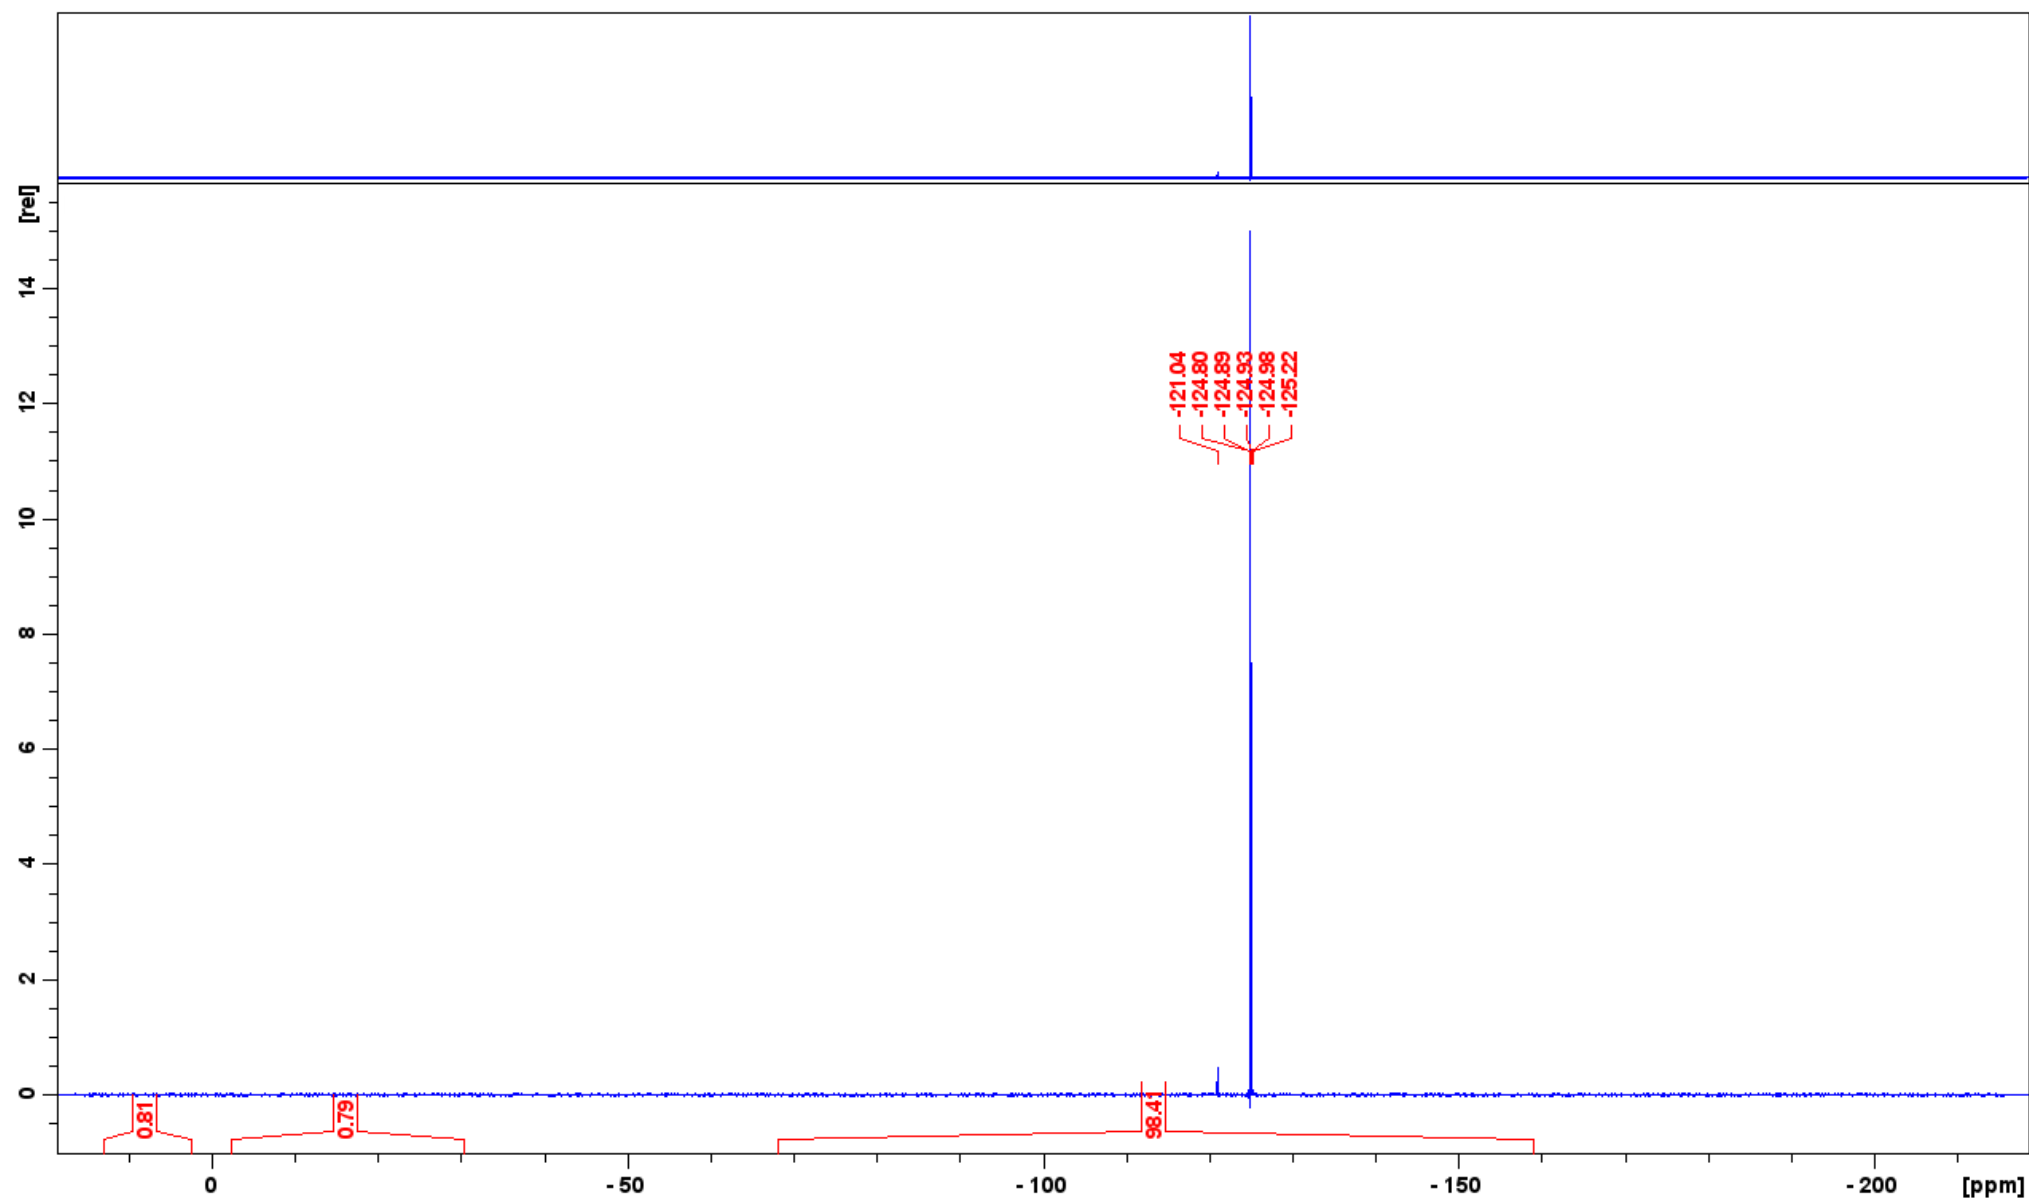

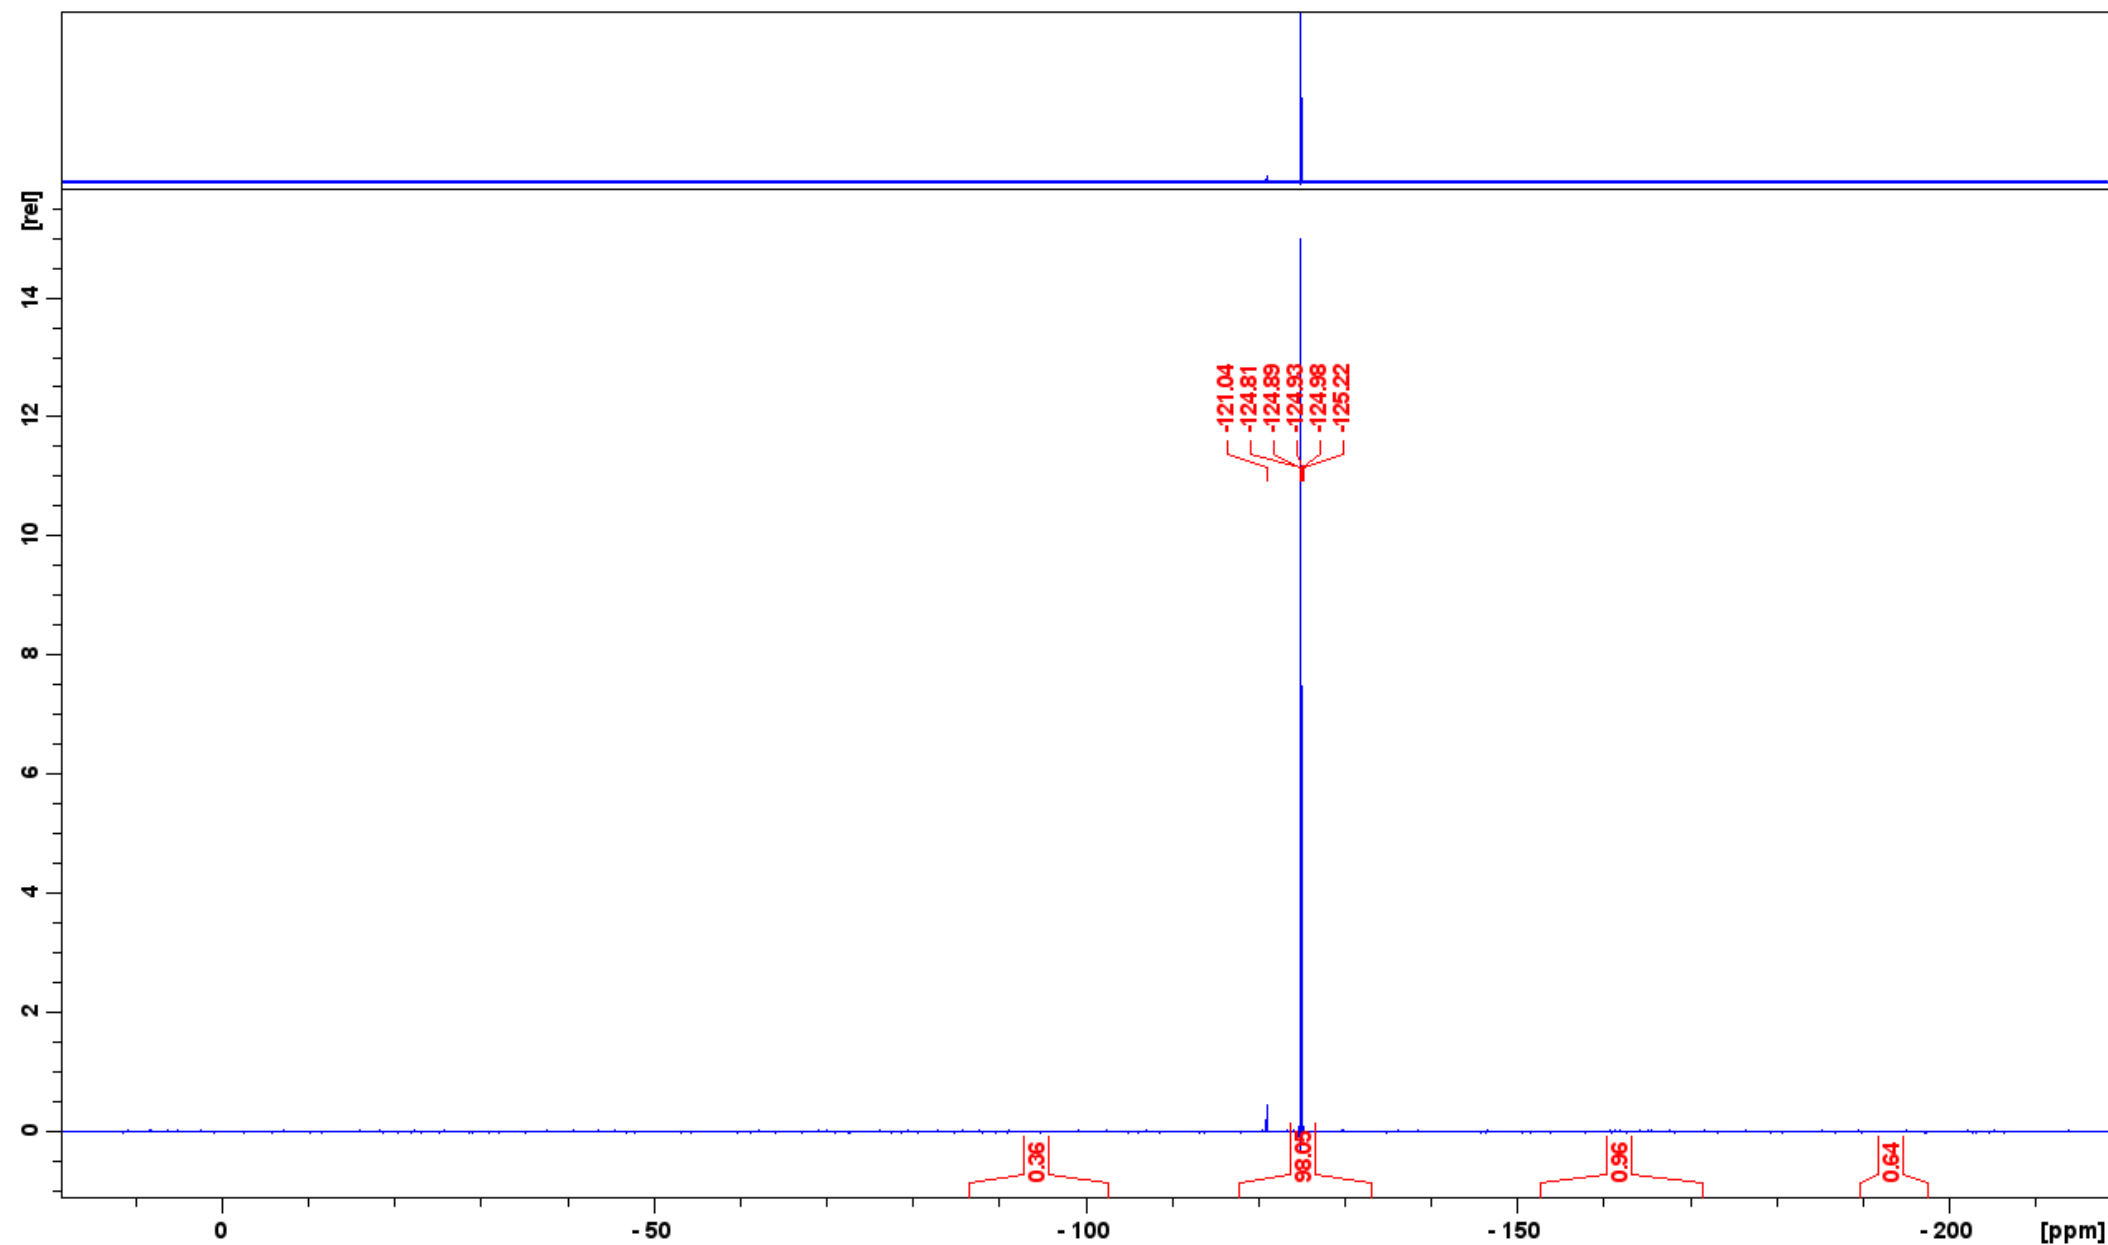

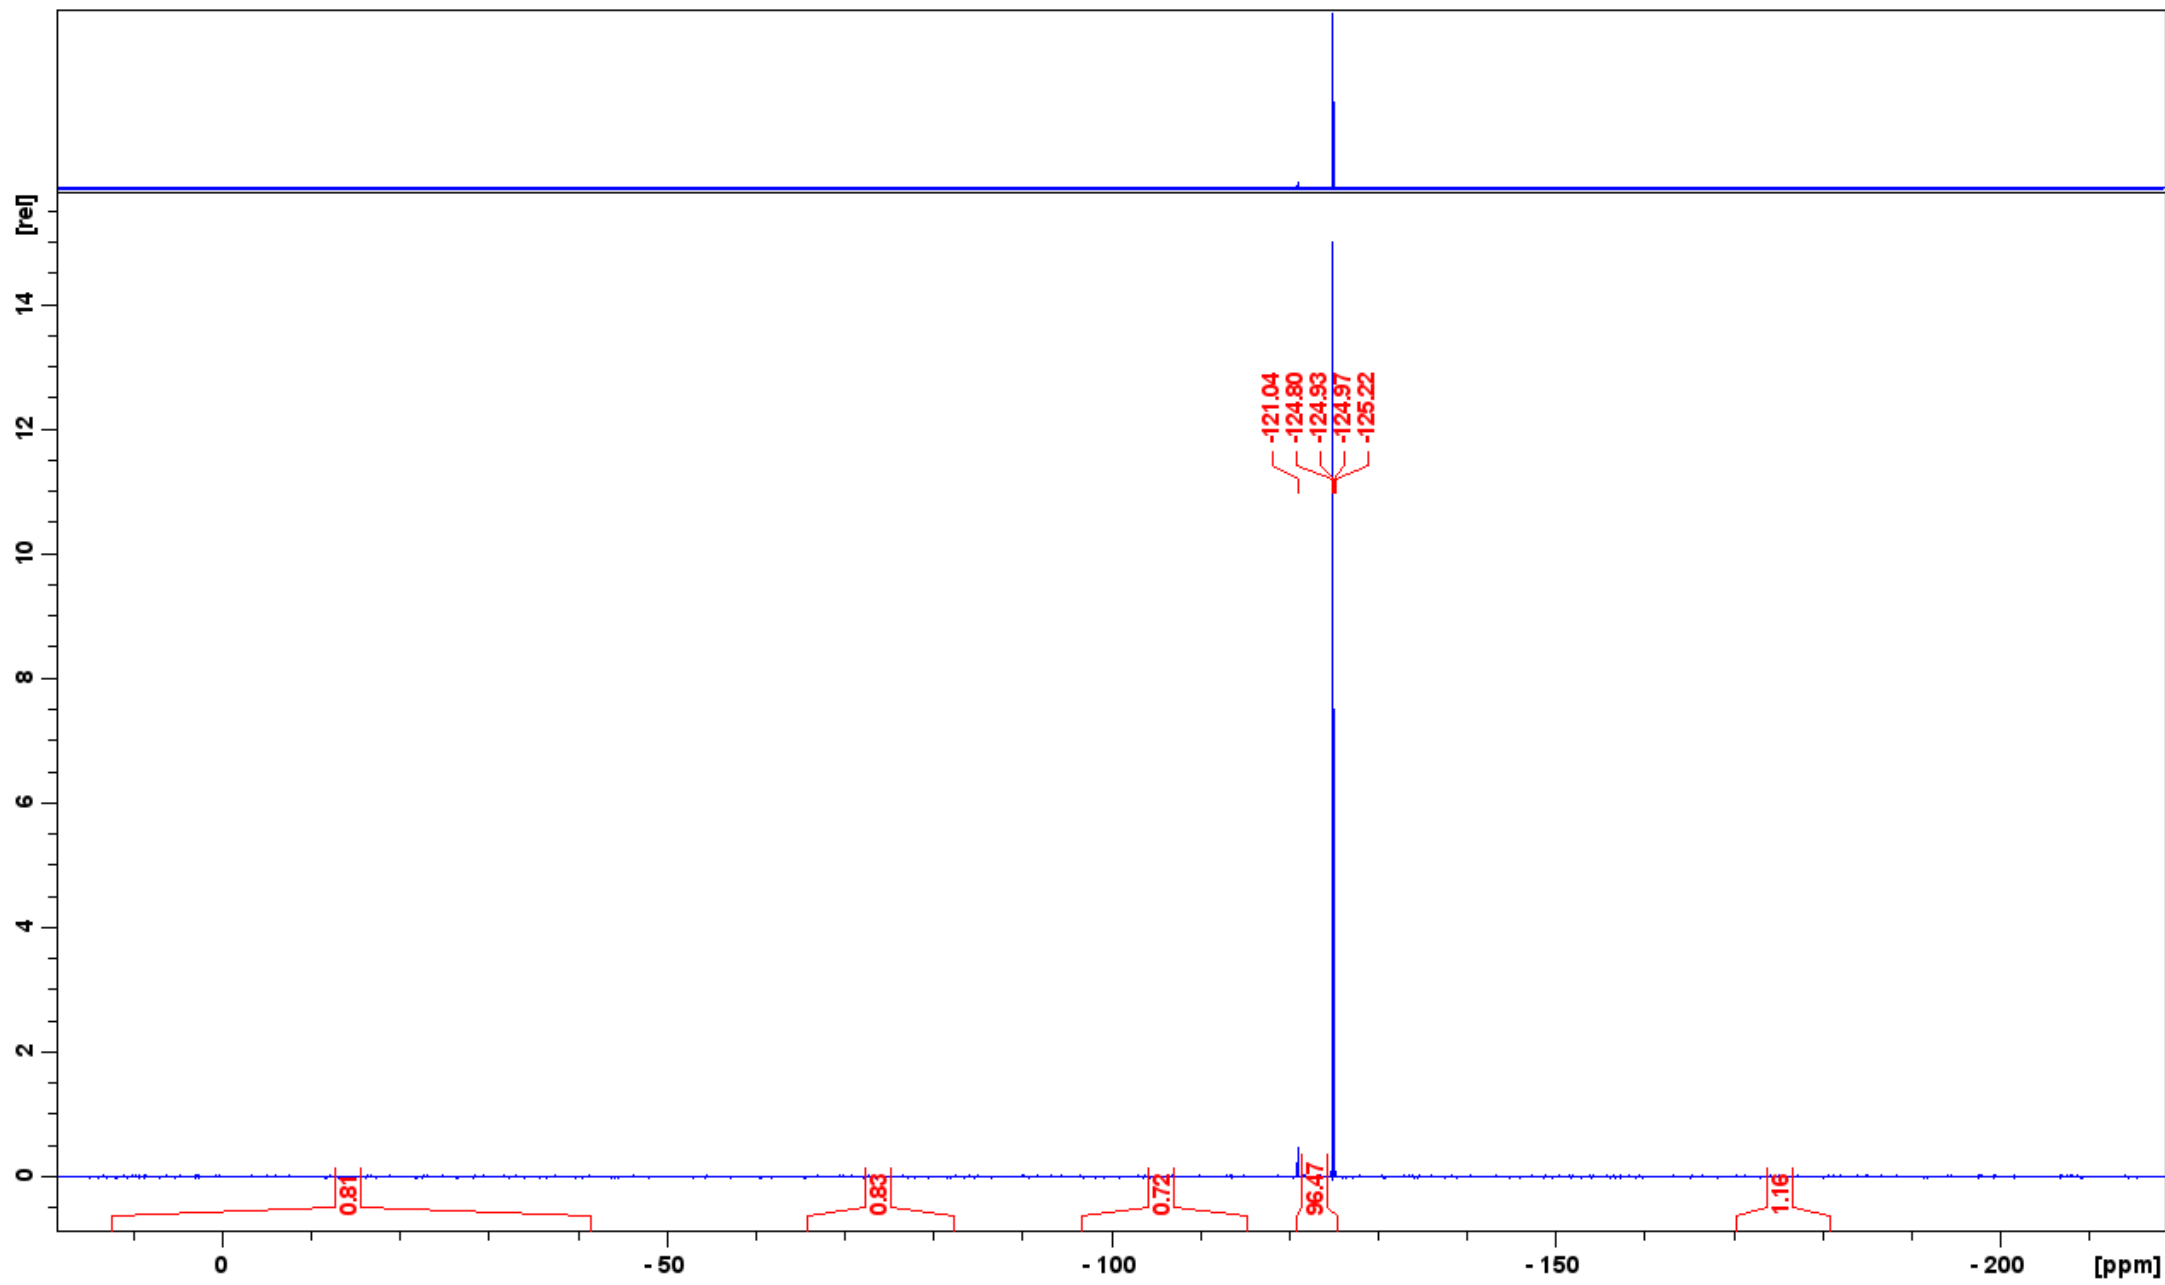

Supplement: d4ay01723d1.pdf [file d4ay01723d1.pdf]
